# Supplementary material
Source: publisher figshare collection journal article supplement (https://acs.figshare.com/ndownloader/files/4765999)
Supplement: Supplementary file 1 [file 4765999]

 
data_preg108
 
_audit_creation_method            SHELXL-97
_publ_contact_author_name         P.S.Pregosin
_publ_contact_author_address      
'Lab. Inorganic Chemistry - ETHZ, CH-8093 Zuerich'
_publ_contact_author_email        pregosin@inorg.chem.ethz.ch
loop_
 _publ_author_name 
'I. Fernadez'
'P. S. Pregosin'
'A. Albinati'
'S. Rizzato'
_publ_requested_journal           'Organometallics' 
_publ_section_title
;
 X-ray Diffraction, PGSE Diffusion and Related NMR Studies on a Series 
 of Cp*-Based Ru(IV)(Cp*)(eta3-CH2-CH-CHPh) Allyl Complexes.
;
_compound_number                  '2b' 
_chemical_formula_sum
 'C22 H31 Cl F6 N O P Ru'
_chemical_formula_weight          606.97
 
loop_
 _atom_type_symbol
 _atom_type_description
 _atom_type_scat_dispersion_real
 _atom_type_scat_dispersion_imag
 _atom_type_scat_source
 'C'  'C'   0.0033   0.0016
 'International Tables Vol C Tables 4.2.6.8 and 6.1.1.4'
 'H'  'H'   0.0000   0.0000
 'International Tables Vol C Tables 4.2.6.8 and 6.1.1.4'
 'N'  'N'   0.0061   0.0033
 'International Tables Vol C Tables 4.2.6.8 and 6.1.1.4'
 'O'  'O'   0.0106   0.0060
 'International Tables Vol C Tables 4.2.6.8 and 6.1.1.4'
 'F'  'F'   0.0171   0.0103
 'International Tables Vol C Tables 4.2.6.8 and 6.1.1.4'
 'P'  'P'   0.1023   0.0942
 'International Tables Vol C Tables 4.2.6.8 and 6.1.1.4'
 'Cl'  'Cl'   0.1484   0.1585
 'International Tables Vol C Tables 4.2.6.8 and 6.1.1.4'
 'Ru'  'Ru'  -1.2594   0.8363
 'International Tables Vol C Tables 4.2.6.8 and 6.1.1.4'
 
_symmetry_cell_setting            Monoclinic
_symmetry_space_group_name_H-M    P21/c
 
loop_
 _symmetry_equiv_pos_as_xyz
 'x, y, z'
 '-x, y+1/2, -z+1/2'
 '-x, -y, -z'
 'x, -y-1/2, z-1/2'
 
_cell_length_a                    8.2667(6)
_cell_length_b                    17.4414(13)
_cell_length_c                    17.3718(13)
_cell_angle_alpha                 90.00
_cell_angle_beta                  101.083(2)
_cell_angle_gamma                 90.00
_cell_volume                      2458.0(3)
_cell_formula_units_Z             4
_cell_measurement_temperature     120(2)
_cell_measurement_reflns_used     3622
_cell_measurement_theta_min       2.35
_cell_measurement_theta_max       24.30
 
_exptl_crystal_description        'prismatic'
_exptl_crystal_colour             'red'
_exptl_crystal_size_max           0.12
_exptl_crystal_size_mid           0.08
_exptl_crystal_size_min           0.04
_exptl_crystal_density_diffrn     1.640
_exptl_crystal_density_method     'not measured'
_exptl_crystal_F_000              1232
_exptl_absorpt_coefficient_mu     0.872
_exptl_absorpt_correction_type    'empirical, multi scan'
_exptl_absorpt_correction_T_min   0.82844
_exptl_absorpt_correction_T_max   1.00000
_exptl_absorpt_process_details    'Sadabs 2.01 (Bruker AXS, 1999)'
 
_exptl_special_details
;
 1542 frames were collected on a Brucker APEX CCD diffractometer with a 
 sample to detector distance of 47.30 mm. The counting time per frame 
 was 30 sec and the scan width per frame 0.3 deg. 
;

 
_diffrn_ambient_temperature       120(2)
_diffrn_radiation_wavelength      0.71073
_diffrn_radiation_type            MoK\a
_diffrn_radiation_source          'fine-focus sealed tube'
_diffrn_radiation_monochromator   graphite
_diffrn_measurement_device_type   'Bruker SMART CCD'
_diffrn_measurement_method        'phi and omega scans'
 
_diffrn_reflns_number             19469
_diffrn_reflns_av_R_equivalents   0.0475
_diffrn_reflns_av_sigmaI/netI     0.0464
_diffrn_reflns_limit_h_min        -10
_diffrn_reflns_limit_h_max        10
_diffrn_reflns_limit_k_min        -18
_diffrn_reflns_limit_k_max        21
_diffrn_reflns_limit_l_min        -21
_diffrn_reflns_limit_l_max        21
_diffrn_reflns_theta_min          1.67
_diffrn_reflns_theta_max          26.62
_reflns_number_total              5120
_reflns_number_gt                 4163
_reflns_threshold_expression      >2sigma(I)
 
_computing_data_collection        'SMART      (Bruker AXS, 2001)'
_computing_cell_refinement        'SAINTPLUS  (Bruker AXS, 1999)'
_computing_data_reduction         'SAINTPLUS  (Bruker AXS, 1999)'
_computing_structure_solution     'SHELXS-97 (Sheldrick, 1990)'
_computing_structure_refinement   'SHELXL-97 (Sheldrick, 1997)'
_computing_molecular_graphics     
 'ORTEP for Windows v1.074 (L.J. Farrugia 1997)'
_computing_publication_material  
  'WinGX v1.64.05(L.J. Farrugia,J. Appl. Cryst.,1999,32, 837)'
 
_refine_special_details
;
 Refinement of F^2^ against ALL reflections.  The weighted R-factor wR and
 goodness of fit S are based on F^2^, conventional R-factors R are based
 on F, with F set to zero for negative F^2^. The threshold expression of
 F^2^ > 2sigma(F^2^) is used only for calculating R-factors(gt) etc. and is
 not relevant to the choice of reflections for refinement.  R-factors based
 on F^2^ are statistically about twice as large as those based on F, and R-
 factors based on ALL data will be even larger.
;
 
_refine_ls_structure_factor_coef  Fsqd
_refine_ls_matrix_type            full
_refine_ls_weighting_scheme       calc
_refine_ls_weighting_details
 'calc w=1/[\s^2^(Fo^2^)+(0.0542P)^2^+0.2960P] where P=(Fo^2^+2Fc^2^)/3'
_atom_sites_solution_primary      patterson
_atom_sites_solution_secondary    difmap
_atom_sites_solution_hydrogens    geom
_refine_ls_hydrogen_treatment     mixed
_refine_ls_extinction_method      none
_refine_ls_extinction_coef        'not refined'
_refine_ls_number_reflns          5120
_refine_ls_number_parameters      326
_refine_ls_number_restraints      0
_refine_ls_R_factor_all           0.0525
_refine_ls_R_factor_gt            0.0399
_refine_ls_wR_factor_ref          0.0983
_refine_ls_wR_factor_gt           0.0926
_refine_ls_goodness_of_fit_ref    1.026
_refine_ls_restrained_S_all       1.026
_refine_ls_shift/su_max           0.105
_refine_ls_shift/su_mean          0.004
 
loop_
 _atom_site_label
 _atom_site_type_symbol
 _atom_site_fract_x
 _atom_site_fract_y
 _atom_site_fract_z
 _atom_site_U_iso_or_equiv
 _atom_site_adp_type
 _atom_site_occupancy
 _atom_site_symmetry_multiplicity
 _atom_site_calc_flag
 _atom_site_refinement_flags
 _atom_site_disorder_assembly
 _atom_site_disorder_group
Ru Ru 0.12411(3) 0.572412(15) 0.203666(14) 0.02004(9) Uani 1 1 d . . .
Cl Cl -0.10092(10) 0.56199(5) 0.09504(5) 0.0353(2) Uani 1 1 d . . .
C1L C -0.0542(5) 0.6343(2) 0.2562(2) 0.0339(8) Uani 1 1 d . . .
C2L C 0.0370(4) 0.6867(2) 0.2200(2) 0.0280(7) Uani 1 1 d . . .
C3L C 0.2041(4) 0.69301(19) 0.25313(19) 0.0269(7) Uani 1 1 d . . .
C111 C 0.3242(4) 0.74054(19) 0.22202(19) 0.0262(7) Uani 1 1 d . . .
C112 C 0.4900(4) 0.7375(2) 0.2580(2) 0.0336(8) Uani 1 1 d . . .
H112 H 0.5224 0.7065 0.3018 0.026(9) Uiso 1 1 calc R . .
C113 C 0.6062(5) 0.7798(2) 0.2297(2) 0.0408(9) Uani 1 1 d . . .
H113 H 0.7165 0.7769 0.2541 0.061(13) Uiso 1 1 calc R . .
C114 C 0.5590(5) 0.8270(2) 0.1645(2) 0.0424(10) Uani 1 1 d . . .
H114 H 0.6375 0.8549 0.1445 0.040(11) Uiso 1 1 calc R . .
C115 C 0.3957(5) 0.8320(2) 0.1301(2) 0.0381(9) Uani 1 1 d . . .
H115 H 0.3634 0.8649 0.0878 0.026(9) Uiso 1 1 calc R . .
C116 C 0.2777(4) 0.7888(2) 0.15747(19) 0.0302(8) Uani 1 1 d . . .
H116 H 0.1676 0.7919 0.1328 0.026(9) Uiso 1 1 calc R . .
H1A H -0.020(5) 0.624(2) 0.313(2) 0.043(11) Uiso 1 1 d . . .
H1B H -0.162(5) 0.624(2) 0.231(2) 0.040(11) Uiso 1 1 d . . .
H2 H -0.010(5) 0.708(2) 0.170(2) 0.035(10) Uiso 1 1 d . . .
H3 H 0.242(4) 0.6783(18) 0.3083(18) 0.018(8) Uiso 1 1 d . . .
O1 O 0.2623(3) 0.60384(13) 0.11817(12) 0.0246(5) Uani 1 1 d . . .
C1A C 0.2207(4) 0.64427(19) 0.05787(18) 0.0256(7) Uani 1 1 d . . .
H1A1 H 0.1121 0.6608 0.0436 0.031 Uiso 1 1 calc R . .
N1A N 0.3283(3) 0.66355(16) 0.01463(15) 0.0266(6) Uani 1 1 d . . .
C2A C 0.2853(4) 0.7183(2) -0.0502(2) 0.0323(8) Uani 1 1 d . . .
H2A1 H 0.1690 0.7283 -0.0594 0.039 Uiso 1 1 calc R . .
H2A2 H 0.3141 0.6970 -0.0968 0.039 Uiso 1 1 calc R . .
H2A3 H 0.3446 0.7652 -0.0369 0.039 Uiso 1 1 calc R . .
C3A C 0.5003(4) 0.6398(2) 0.0374(2) 0.0355(9) Uani 1 1 d . . .
H3A1 H 0.5481 0.6630 0.0866 0.043 Uiso 1 1 calc R . .
H3A2 H 0.5601 0.6557 -0.0021 0.043 Uiso 1 1 calc R . .
H3A3 H 0.5057 0.5850 0.0425 0.043 Uiso 1 1 calc R . .
C1 C 0.2379(4) 0.45982(19) 0.19595(19) 0.0255(7) Uani 1 1 d . . .
C2 C 0.0900(4) 0.44590(19) 0.2233(2) 0.0264(7) Uani 1 1 d . . .
C3 C 0.0970(4) 0.48452(18) 0.29564(18) 0.0236(7) Uani 1 1 d . . .
C4 C 0.2553(4) 0.52124(18) 0.31585(18) 0.0231(7) Uani 1 1 d . . .
C5 C 0.3420(4) 0.50638(19) 0.25401(18) 0.0247(7) Uani 1 1 d . . .
C11 C 0.2841(5) 0.4288(2) 0.1232(2) 0.0376(9) Uani 1 1 d . . .
H11A H 0.3223 0.3770 0.1321 0.045 Uiso 1 1 calc R . .
H11B H 0.3701 0.4598 0.1092 0.045 Uiso 1 1 calc R . .
H11C H 0.1896 0.4298 0.0813 0.045 Uiso 1 1 calc R . .
C12 C -0.0479(5) 0.3956(2) 0.1837(2) 0.0393(9) Uani 1 1 d . . .
H12A H -0.0241 0.3432 0.1989 0.047 Uiso 1 1 calc R . .
H12B H -0.0594 0.4002 0.1278 0.047 Uiso 1 1 calc R . .
H12C H -0.1486 0.4110 0.1990 0.047 Uiso 1 1 calc R . .
C13 C -0.0277(4) 0.4775(2) 0.3470(2) 0.0328(8) Uani 1 1 d . . .
H13A H -0.1365 0.4785 0.3153 0.039 Uiso 1 1 calc R . .
H13B H -0.0153 0.5194 0.3835 0.039 Uiso 1 1 calc R . .
H13C H -0.0116 0.4299 0.3753 0.039 Uiso 1 1 calc R . .
C14 C 0.3217(4) 0.5580(2) 0.39362(19) 0.0308(8) Uani 1 1 d . . .
H14A H 0.3559 0.5189 0.4322 0.037 Uiso 1 1 calc R . .
H14B H 0.2373 0.5888 0.4092 0.037 Uiso 1 1 calc R . .
H14C H 0.4143 0.5898 0.3892 0.037 Uiso 1 1 calc R . .
C15 C 0.5168(4) 0.5272(2) 0.2521(2) 0.0325(8) Uani 1 1 d . . .
H15A H 0.5596 0.5593 0.2961 0.039 Uiso 1 1 calc R . .
H15B H 0.5209 0.5541 0.2043 0.039 Uiso 1 1 calc R . .
H15C H 0.5819 0.4813 0.2545 0.039 Uiso 1 1 calc R . .
P P 0.81565(10) 0.82513(6) 0.97288(5) 0.0286(2) Uani 1 1 d . . .
F1 F 0.9972(2) 0.85907(14) 0.98056(13) 0.0453(6) Uani 1 1 d . . .
F2 F 0.6347(3) 0.79134(16) 0.96451(15) 0.0611(7) Uani 1 1 d . . .
F3 F 0.7551(3) 0.87160(17) 0.89447(13) 0.0601(8) Uani 1 1 d . . .
F4 F 0.7639(3) 0.8944(2) 1.02048(18) 0.0793(9) Uani 1 1 d . . .
F5 F 0.8744(3) 0.7805(2) 1.05131(18) 0.0939(12) Uani 1 1 d . . .
F6 F 0.8660(3) 0.75703(19) 0.9230(2) 0.0950(12) Uani 1 1 d . . .
 
loop_
 _atom_site_aniso_label
 _atom_site_aniso_U_11
 _atom_site_aniso_U_22
 _atom_site_aniso_U_33
 _atom_site_aniso_U_23
 _atom_site_aniso_U_13
 _atom_site_aniso_U_12
Ru 0.01737(14) 0.02122(16) 0.02106(14) 0.00120(10) 0.00254(9) 0.00118(10)
Cl 0.0248(4) 0.0427(6) 0.0335(4) 0.0081(4) -0.0069(3) -0.0039(4)
C1L 0.033(2) 0.028(2) 0.044(2) 0.0045(17) 0.0148(18) 0.0085(16)
C2L 0.0298(17) 0.0245(19) 0.0318(18) 0.0035(15) 0.0107(15) 0.0118(14)
C3L 0.0385(19) 0.0215(19) 0.0213(16) -0.0032(13) 0.0069(14) 0.0030(14)
C111 0.0348(18) 0.0174(18) 0.0268(17) -0.0053(13) 0.0069(14) -0.0003(14)
C112 0.037(2) 0.025(2) 0.0348(19) -0.0052(15) -0.0026(16) -0.0007(15)
C113 0.033(2) 0.030(2) 0.057(2) -0.0140(19) 0.0029(18) -0.0053(16)
C114 0.049(2) 0.034(2) 0.049(2) -0.0160(19) 0.022(2) -0.0183(18)
C115 0.057(3) 0.028(2) 0.0312(19) -0.0041(16) 0.0123(18) -0.0107(18)
C116 0.0357(19) 0.024(2) 0.0295(17) -0.0040(15) 0.0039(15) -0.0028(15)
O1 0.0253(11) 0.0263(13) 0.0224(11) 0.0016(10) 0.0053(9) 0.0015(10)
C1A 0.0210(16) 0.029(2) 0.0262(16) -0.0049(14) 0.0026(13) -0.0009(13)
N1A 0.0284(14) 0.0271(17) 0.0249(14) 0.0021(12) 0.0064(11) -0.0011(12)
C2A 0.0305(18) 0.033(2) 0.0325(18) 0.0076(16) 0.0035(15) -0.0059(15)
C3A 0.0302(19) 0.043(2) 0.0362(19) 0.0036(17) 0.0134(16) 0.0076(16)
C1 0.0302(17) 0.0174(17) 0.0283(17) 0.0008(13) 0.0038(14) 0.0033(14)
C2 0.0264(16) 0.0207(19) 0.0292(17) 0.0060(13) -0.0019(13) 0.0015(13)
C3 0.0206(15) 0.0214(18) 0.0276(16) 0.0055(13) 0.0017(13) 0.0024(13)
C4 0.0232(16) 0.0205(18) 0.0234(16) 0.0033(13) -0.0009(13) 0.0014(13)
C5 0.0235(16) 0.0228(18) 0.0272(17) 0.0057(14) 0.0037(13) 0.0056(13)
C11 0.051(2) 0.029(2) 0.0340(19) -0.0014(16) 0.0112(17) 0.0079(17)
C12 0.042(2) 0.029(2) 0.042(2) -0.0005(17) -0.0032(17) -0.0088(17)
C13 0.0300(18) 0.034(2) 0.0348(19) 0.0095(16) 0.0075(15) 0.0002(15)
C14 0.0352(19) 0.032(2) 0.0226(16) -0.0005(14) -0.0009(14) -0.0019(15)
C15 0.0209(16) 0.035(2) 0.040(2) 0.0049(16) 0.0032(14) 0.0040(15)
P 0.0222(4) 0.0327(5) 0.0292(5) 0.0055(4) 0.0005(3) -0.0023(4)
F1 0.0273(11) 0.0570(16) 0.0505(13) 0.0023(11) 0.0048(10) -0.0112(10)
F2 0.0295(12) 0.0741(19) 0.0756(17) 0.0318(14) -0.0003(12) -0.0160(12)
F3 0.0410(13) 0.094(2) 0.0428(13) 0.0302(14) 0.0028(11) -0.0040(13)
F4 0.0538(16) 0.098(2) 0.086(2) -0.0507(18) 0.0127(15) 0.0085(16)
F5 0.0466(16) 0.145(3) 0.081(2) 0.081(2) -0.0120(14) -0.0114(17)
F6 0.0506(17) 0.070(2) 0.157(3) -0.067(2) 0.0007(18) 0.0062(15)
 
_geom_special_details
;
 All esds (except the esd in the dihedral angle between two l.s. planes)
 are estimated using the full covariance matrix.  The cell esds are taken
 into account individually in the estimation of esds in distances, angles
 and torsion angles; correlations between esds in cell parameters are only
 used when they are defined by crystal symmetry.  An approximate (isotropic)
 treatment of cell esds is used for estimating esds involving l.s. planes.
;
 
loop_
 _geom_bond_atom_site_label_1
 _geom_bond_atom_site_label_2
 _geom_bond_distance
 _geom_bond_site_symmetry_2
 _geom_bond_publ_flag
Ru O1 2.113(2) . ?
Ru C2L 2.157(3) . ?
Ru C1L 2.164(4) . ?
Ru C5 2.175(3) . ?
Ru C1 2.193(3) . ?
Ru C4 2.227(3) . ?
Ru C3 2.256(3) . ?
Ru C2 2.258(3) . ?
Ru C3L 2.320(3) . ?
Ru Cl 2.3886(8) . ?
C1L C2L 1.408(5) . ?
C1L H1A 0.99(4) . ?
C1L H1B 0.93(4) . ?
C2L C3L 1.395(5) . ?
C2L H2 0.95(4) . ?
C3L C111 1.474(5) . ?
C3L H3 0.98(3) . ?
C111 C112 1.393(5) . ?
C111 C116 1.395(5) . ?
C112 C113 1.375(5) . ?
C112 H112 0.9300 . ?
C113 C114 1.394(6) . ?
C113 H113 0.9300 . ?
C114 C115 1.370(6) . ?
C114 H114 0.9300 . ?
C115 C116 1.386(5) . ?
C115 H115 0.9300 . ?
C116 H116 0.9300 . ?
O1 C1A 1.255(4) . ?
C1A N1A 1.314(4) . ?
C1A H1A1 0.9300 . ?
N1A C3A 1.461(4) . ?
N1A C2A 1.467(4) . ?
C2A H2A1 0.9600 . ?
C2A H2A2 0.9600 . ?
C2A H2A3 0.9600 . ?
C3A H3A1 0.9600 . ?
C3A H3A2 0.9600 . ?
C3A H3A3 0.9600 . ?
C1 C2 1.415(5) . ?
C1 C5 1.443(5) . ?
C1 C11 1.490(5) . ?
C2 C3 1.418(5) . ?
C2 C12 1.497(5) . ?
C3 C4 1.438(4) . ?
C3 C13 1.493(4) . ?
C4 C5 1.425(4) . ?
C4 C14 1.501(4) . ?
C5 C15 1.496(4) . ?
C11 H11A 0.9600 . ?
C11 H11B 0.9600 . ?
C11 H11C 0.9600 . ?
C12 H12A 0.9600 . ?
C12 H12B 0.9600 . ?
C12 H12C 0.9600 . ?
C13 H13A 0.9600 . ?
C13 H13B 0.9600 . ?
C13 H13C 0.9600 . ?
C14 H14A 0.9600 . ?
C14 H14B 0.9600 . ?
C14 H14C 0.9600 . ?
C15 H15A 0.9600 . ?
C15 H15B 0.9600 . ?
C15 H15C 0.9600 . ?
P F5 1.563(3) . ?
P F4 1.569(3) . ?
P F6 1.572(3) . ?
P F3 1.581(2) . ?
P F2 1.588(2) . ?
P F1 1.595(2) . ?
 
loop_
 _geom_angle_atom_site_label_1
 _geom_angle_atom_site_label_2
 _geom_angle_atom_site_label_3
 _geom_angle
 _geom_angle_site_symmetry_1
 _geom_angle_site_symmetry_3
 _geom_angle_publ_flag
O1 Ru C2L 95.29(11) . . ?
O1 Ru C1L 132.15(12) . . ?
C2L Ru C1L 38.02(13) . . ?
O1 Ru C5 84.38(10) . . ?
C2L Ru C5 135.08(13) . . ?
C1L Ru C5 132.29(14) . . ?
O1 Ru C1 83.85(11) . . ?
C2L Ru C1 173.64(13) . . ?
C1L Ru C1 143.81(13) . . ?
C5 Ru C1 38.59(12) . . ?
O1 Ru C4 118.75(10) . . ?
C2L Ru C4 111.96(13) . . ?
C1L Ru C4 95.02(14) . . ?
C5 Ru C4 37.76(11) . . ?
C1 Ru C4 63.39(12) . . ?
O1 Ru C3 144.56(10) . . ?
C2L Ru C3 116.98(12) . . ?
C1L Ru C3 82.64(13) . . ?
C5 Ru C3 62.78(11) . . ?
C1 Ru C3 62.42(12) . . ?
C4 Ru C3 37.42(11) . . ?
O1 Ru C2 117.34(11) . . ?
C2L Ru C2 145.96(13) . . ?
C1L Ru C2 107.98(14) . . ?
C5 Ru C2 62.59(12) . . ?
C1 Ru C2 37.03(12) . . ?
C4 Ru C2 61.99(12) . . ?
C3 Ru C2 36.61(12) . . ?
O1 Ru C3L 82.59(10) . . ?
C2L Ru C3L 36.08(13) . . ?
C1L Ru C3L 63.95(14) . . ?
C5 Ru C3L 100.14(13) . . ?
C1 Ru C3L 137.69(12) . . ?
C4 Ru C3L 89.03(12) . . ?
C3 Ru C3L 114.44(12) . . ?
C2 Ru C3L 149.88(12) . . ?
O1 Ru Cl 84.76(6) . . ?
C2L Ru Cl 86.87(10) . . ?
C1L Ru Cl 83.15(12) . . ?
C5 Ru Cl 137.43(9) . . ?
C1 Ru Cl 99.31(9) . . ?
C4 Ru Cl 146.65(9) . . ?
C3 Ru Cl 109.85(8) . . ?
C2 Ru Cl 86.79(8) . . ?
C3L Ru Cl 119.01(9) . . ?
C2L C1L Ru 70.69(19) . . ?
C2L C1L H1A 119(2) . . ?
Ru C1L H1A 104(2) . . ?
C2L C1L H1B 118(2) . . ?
Ru C1L H1B 112(2) . . ?
H1A C1L H1B 120(3) . . ?
C3L C2L C1L 116.1(3) . . ?
C3L C2L Ru 78.4(2) . . ?
C1L C2L Ru 71.3(2) . . ?
C3L C2L H2 123(2) . . ?
C1L C2L H2 120(2) . . ?
Ru C2L H2 109(2) . . ?
C2L C3L C111 125.2(3) . . ?
C2L C3L Ru 65.57(19) . . ?
C111 C3L Ru 122.6(2) . . ?
C2L C3L H3 119.2(18) . . ?
C111 C3L H3 113.0(18) . . ?
Ru C3L H3 98.0(19) . . ?
C112 C111 C116 118.6(3) . . ?
C112 C111 C3L 119.2(3) . . ?
C116 C111 C3L 122.2(3) . . ?
C113 C112 C111 120.9(4) . . ?
C113 C112 H112 119.5 . . ?
C111 C112 H112 119.5 . . ?
C112 C113 C114 120.1(4) . . ?
C112 C113 H113 119.9 . . ?
C114 C113 H113 119.9 . . ?
C115 C114 C113 119.3(4) . . ?
C115 C114 H114 120.3 . . ?
C113 C114 H114 120.3 . . ?
C114 C115 C116 121.0(4) . . ?
C114 C115 H115 119.5 . . ?
C116 C115 H115 119.5 . . ?
C115 C116 C111 120.0(3) . . ?
C115 C116 H116 120.0 . . ?
C111 C116 H116 120.0 . . ?
C1A O1 Ru 129.3(2) . . ?
O1 C1A N1A 120.9(3) . . ?
O1 C1A H1A1 119.5 . . ?
N1A C1A H1A1 119.5 . . ?
C1A N1A C3A 120.2(3) . . ?
C1A N1A C2A 121.0(3) . . ?
C3A N1A C2A 118.2(3) . . ?
N1A C2A H2A1 109.5 . . ?
N1A C2A H2A2 109.5 . . ?
H2A1 C2A H2A2 109.5 . . ?
N1A C2A H2A3 109.5 . . ?
H2A1 C2A H2A3 109.5 . . ?
H2A2 C2A H2A3 109.5 . . ?
N1A C3A H3A1 109.5 . . ?
N1A C3A H3A2 109.5 . . ?
H3A1 C3A H3A2 109.5 . . ?
N1A C3A H3A3 109.5 . . ?
H3A1 C3A H3A3 109.5 . . ?
H3A2 C3A H3A3 109.5 . . ?
C2 C1 C5 107.4(3) . . ?
C2 C1 C11 126.9(3) . . ?
C5 C1 C11 125.5(3) . . ?
C2 C1 Ru 74.01(19) . . ?
C5 C1 Ru 70.03(18) . . ?
C11 C1 Ru 124.0(2) . . ?
C1 C2 C3 109.0(3) . . ?
C1 C2 C12 125.3(3) . . ?
C3 C2 C12 125.7(3) . . ?
C1 C2 Ru 68.96(18) . . ?
C3 C2 Ru 71.61(19) . . ?
C12 C2 Ru 127.6(2) . . ?
C2 C3 C4 107.9(3) . . ?
C2 C3 C13 125.2(3) . . ?
C4 C3 C13 126.2(3) . . ?
C2 C3 Ru 71.79(18) . . ?
C4 C3 Ru 70.18(17) . . ?
C13 C3 Ru 130.8(2) . . ?
C5 C4 C3 107.5(3) . . ?
C5 C4 C14 127.3(3) . . ?
C3 C4 C14 124.6(3) . . ?
C5 C4 Ru 69.15(17) . . ?
C3 C4 Ru 72.40(17) . . ?
C14 C4 Ru 130.5(2) . . ?
C4 C5 C1 108.1(3) . . ?
C4 C5 C15 126.9(3) . . ?
C1 C5 C15 124.7(3) . . ?
C4 C5 Ru 73.09(18) . . ?
C1 C5 Ru 71.38(18) . . ?
C15 C5 Ru 126.3(2) . . ?
C1 C11 H11A 109.5 . . ?
C1 C11 H11B 109.5 . . ?
H11A C11 H11B 109.5 . . ?
C1 C11 H11C 109.5 . . ?
H11A C11 H11C 109.5 . . ?
H11B C11 H11C 109.5 . . ?
C2 C12 H12A 109.5 . . ?
C2 C12 H12B 109.5 . . ?
H12A C12 H12B 109.5 . . ?
C2 C12 H12C 109.5 . . ?
H12A C12 H12C 109.5 . . ?
H12B C12 H12C 109.5 . . ?
C3 C13 H13A 109.5 . . ?
C3 C13 H13B 109.5 . . ?
H13A C13 H13B 109.5 . . ?
C3 C13 H13C 109.5 . . ?
H13A C13 H13C 109.5 . . ?
H13B C13 H13C 109.5 . . ?
C4 C14 H14A 109.5 . . ?
C4 C14 H14B 109.5 . . ?
H14A C14 H14B 109.5 . . ?
C4 C14 H14C 109.5 . . ?
H14A C14 H14C 109.5 . . ?
H14B C14 H14C 109.5 . . ?
C5 C15 H15A 109.5 . . ?
C5 C15 H15B 109.5 . . ?
H15A C15 H15B 109.5 . . ?
C5 C15 H15C 109.5 . . ?
H15A C15 H15C 109.5 . . ?
H15B C15 H15C 109.5 . . ?
F5 P F4 89.7(2) . . ?
F5 P F6 91.9(2) . . ?
F4 P F6 178.4(2) . . ?
F5 P F3 178.9(2) . . ?
F4 P F3 89.22(18) . . ?
F6 P F3 89.22(19) . . ?
F5 P F2 91.41(14) . . ?
F4 P F2 89.22(16) . . ?
F6 P F2 90.78(16) . . ?
F3 P F2 88.57(13) . . ?
F5 P F1 88.96(14) . . ?
F4 P F1 91.02(15) . . ?
F6 P F1 88.96(15) . . ?
F3 P F1 91.06(13) . . ?
F2 P F1 179.56(14) . . ?
 
loop_
 _geom_torsion_atom_site_label_1
 _geom_torsion_atom_site_label_2
 _geom_torsion_atom_site_label_3
 _geom_torsion_atom_site_label_4
 _geom_torsion
 _geom_torsion_site_symmetry_1
 _geom_torsion_site_symmetry_2
 _geom_torsion_site_symmetry_3
 _geom_torsion_site_symmetry_4
 _geom_torsion_publ_flag
O1 Ru C1L C2L -17.2(3) . . . . ?
C5 Ru C1L C2L 113.0(2) . . . . ?
C1 Ru C1L C2L 169.9(2) . . . . ?
C4 Ru C1L C2L 119.8(2) . . . . ?
C3 Ru C1L C2L 155.2(2) . . . . ?
C2 Ru C1L C2L -178.0(2) . . . . ?
C3L Ru C1L C2L 33.3(2) . . . . ?
Cl Ru C1L C2L -93.7(2) . . . . ?
Ru C1L C2L C3L -66.2(3) . . . . ?
O1 Ru C2L C3L -69.7(2) . . . . ?
C1L Ru C2L C3L 123.0(3) . . . . ?
C5 Ru C2L C3L 17.7(3) . . . . ?
C1 Ru C2L C3L 12.3(12) . . . . ?
C4 Ru C2L C3L 54.2(2) . . . . ?
C3 Ru C2L C3L 95.2(2) . . . . ?
C2 Ru C2L C3L 126.3(2) . . . . ?
Cl Ru C2L C3L -154.13(19) . . . . ?
O1 Ru C2L C1L 167.3(2) . . . . ?
C5 Ru C2L C1L -105.3(3) . . . . ?
C1 Ru C2L C1L -110.7(11) . . . . ?
C4 Ru C2L C1L -68.8(3) . . . . ?
C3 Ru C2L C1L -27.8(3) . . . . ?
C2 Ru C2L C1L 3.3(4) . . . . ?
C3L Ru C2L C1L -123.0(3) . . . . ?
Cl Ru C2L C1L 82.9(2) . . . . ?
C1L C2L C3L C111 176.0(3) . . . . ?
Ru C2L C3L C111 113.8(3) . . . . ?
C1L C2L C3L Ru 62.2(3) . . . . ?
O1 Ru C3L C2L 109.7(2) . . . . ?
C1L Ru C3L C2L -35.1(2) . . . . ?
C5 Ru C3L C2L -167.4(2) . . . . ?
C1 Ru C3L C2L -178.0(2) . . . . ?
C4 Ru C3L C2L -131.2(2) . . . . ?
C3 Ru C3L C2L -102.8(2) . . . . ?
C2 Ru C3L C2L -116.0(3) . . . . ?
Cl Ru C3L C2L 29.9(2) . . . . ?
O1 Ru C3L C111 -7.8(3) . . . . ?
C2L Ru C3L C111 -117.5(4) . . . . ?
C1L Ru C3L C111 -152.6(3) . . . . ?
C5 Ru C3L C111 75.1(3) . . . . ?
C1 Ru C3L C111 64.5(3) . . . . ?
C4 Ru C3L C111 111.3(3) . . . . ?
C3 Ru C3L C111 139.7(3) . . . . ?
C2 Ru C3L C111 126.5(3) . . . . ?
Cl Ru C3L C111 -87.6(3) . . . . ?
C2L C3L C111 C112 -175.7(3) . . . . ?
Ru C3L C111 C112 -94.3(3) . . . . ?
C2L C3L C111 C116 4.3(5) . . . . ?
Ru C3L C111 C116 85.7(4) . . . . ?
C116 C111 C112 C113 -1.4(5) . . . . ?
C3L C111 C112 C113 178.6(3) . . . . ?
C111 C112 C113 C114 0.5(6) . . . . ?
C112 C113 C114 C115 1.4(6) . . . . ?
C113 C114 C115 C116 -2.3(6) . . . . ?
C114 C115 C116 C111 1.4(5) . . . . ?
C112 C111 C116 C115 0.4(5) . . . . ?
C3L C111 C116 C115 -179.6(3) . . . . ?
C2L Ru O1 C1A -48.2(3) . . . . ?
C1L Ru O1 C1A -37.7(3) . . . . ?
C5 Ru O1 C1A 176.9(3) . . . . ?
C1 Ru O1 C1A 138.1(3) . . . . ?
C4 Ru O1 C1A -166.9(3) . . . . ?
C3 Ru O1 C1A 155.4(3) . . . . ?
C2 Ru O1 C1A 121.8(3) . . . . ?
C3L Ru O1 C1A -82.1(3) . . . . ?
Cl Ru O1 C1A 38.1(3) . . . . ?
Ru O1 C1A N1A 173.9(2) . . . . ?
O1 C1A N1A C3A -1.7(5) . . . . ?
O1 C1A N1A C2A -172.5(3) . . . . ?
O1 Ru C1 C2 -155.49(19) . . . . ?
C2L Ru C1 C2 121.9(11) . . . . ?
C1L Ru C1 C2 19.3(3) . . . . ?
C5 Ru C1 C2 115.8(3) . . . . ?
C4 Ru C1 C2 78.0(2) . . . . ?
C3 Ru C1 C2 35.77(18) . . . . ?
C3L Ru C1 C2 132.6(2) . . . . ?
Cl Ru C1 C2 -71.84(18) . . . . ?
O1 Ru C1 C5 88.68(18) . . . . ?
C2L Ru C1 C5 6.1(12) . . . . ?
C1L Ru C1 C5 -96.6(3) . . . . ?
C4 Ru C1 C5 -37.83(18) . . . . ?
C3 Ru C1 C5 -80.06(19) . . . . ?
C2 Ru C1 C5 -115.8(3) . . . . ?
C3L Ru C1 C5 16.8(3) . . . . ?
Cl Ru C1 C5 172.33(16) . . . . ?
O1 Ru C1 C11 -31.4(3) . . . . ?
C2L Ru C1 C11 -114.0(11) . . . . ?
C1L Ru C1 C11 143.4(3) . . . . ?
C5 Ru C1 C11 -120.1(4) . . . . ?
C4 Ru C1 C11 -157.9(3) . . . . ?
C3 Ru C1 C11 159.9(3) . . . . ?
C2 Ru C1 C11 124.1(4) . . . . ?
C3L Ru C1 C11 -103.3(3) . . . . ?
Cl Ru C1 C11 52.3(3) . . . . ?
C5 C1 C2 C3 1.8(4) . . . . ?
C11 C1 C2 C3 178.5(3) . . . . ?
Ru C1 C2 C3 -60.7(2) . . . . ?
C5 C1 C2 C12 -175.7(3) . . . . ?
C11 C1 C2 C12 1.0(6) . . . . ?
Ru C1 C2 C12 121.9(3) . . . . ?
C5 C1 C2 Ru 62.5(2) . . . . ?
C11 C1 C2 Ru -120.8(3) . . . . ?
O1 Ru C2 C1 27.7(2) . . . . ?
C2L Ru C2 C1 -170.3(2) . . . . ?
C1L Ru C2 C1 -168.2(2) . . . . ?
C5 Ru C2 C1 -39.23(19) . . . . ?
C4 Ru C2 C1 -82.1(2) . . . . ?
C3 Ru C2 C1 -119.7(3) . . . . ?
C3L Ru C2 C1 -99.3(3) . . . . ?
Cl Ru C2 C1 110.09(18) . . . . ?
O1 Ru C2 C3 147.35(17) . . . . ?
C2L Ru C2 C3 -50.7(3) . . . . ?
C1L Ru C2 C3 -48.5(2) . . . . ?
C5 Ru C2 C3 80.45(19) . . . . ?
C1 Ru C2 C3 119.7(3) . . . . ?
C4 Ru C2 C3 37.58(18) . . . . ?
C3L Ru C2 C3 20.4(3) . . . . ?
Cl Ru C2 C3 -130.23(17) . . . . ?
O1 Ru C2 C12 -91.3(3) . . . . ?
C2L Ru C2 C12 70.7(4) . . . . ?
C1L Ru C2 C12 72.8(3) . . . . ?
C5 Ru C2 C12 -158.2(4) . . . . ?
C1 Ru C2 C12 -119.0(4) . . . . ?
C4 Ru C2 C12 158.9(4) . . . . ?
C3 Ru C2 C12 121.3(4) . . . . ?
C3L Ru C2 C12 141.7(3) . . . . ?
Cl Ru C2 C12 -8.9(3) . . . . ?
C1 C2 C3 C4 -2.2(4) . . . . ?
C12 C2 C3 C4 175.3(3) . . . . ?
Ru C2 C3 C4 -61.2(2) . . . . ?
C1 C2 C3 C13 -173.4(3) . . . . ?
C12 C2 C3 C13 4.0(5) . . . . ?
Ru C2 C3 C13 127.5(3) . . . . ?
C1 C2 C3 Ru 59.0(2) . . . . ?
C12 C2 C3 Ru -123.5(3) . . . . ?
O1 Ru C3 C2 -55.7(3) . . . . ?
C2L Ru C3 C2 150.94(19) . . . . ?
C1L Ru C3 C2 134.1(2) . . . . ?
C5 Ru C3 C2 -79.9(2) . . . . ?
C1 Ru C3 C2 -36.18(18) . . . . ?
C4 Ru C3 C2 -117.6(3) . . . . ?
C3L Ru C3 C2 -168.95(18) . . . . ?
Cl Ru C3 C2 54.13(19) . . . . ?
O1 Ru C3 C4 61.9(3) . . . . ?
C2L Ru C3 C4 -91.4(2) . . . . ?
C1L Ru C3 C4 -108.3(2) . . . . ?
C5 Ru C3 C4 37.73(19) . . . . ?
C1 Ru C3 C4 81.4(2) . . . . ?
C2 Ru C3 C4 117.6(3) . . . . ?
C3L Ru C3 C4 -51.3(2) . . . . ?
Cl Ru C3 C4 171.74(16) . . . . ?
O1 Ru C3 C13 -176.9(2) . . . . ?
C2L Ru C3 C13 29.8(4) . . . . ?
C1L Ru C3 C13 13.0(3) . . . . ?
C5 Ru C3 C13 159.0(3) . . . . ?
C1 Ru C3 C13 -157.3(4) . . . . ?
C4 Ru C3 C13 121.3(4) . . . . ?
C2 Ru C3 C13 -121.1(4) . . . . ?
C3L Ru C3 C13 69.9(3) . . . . ?
Cl Ru C3 C13 -67.0(3) . . . . ?
C2 C3 C4 C5 1.7(4) . . . . ?
C13 C3 C4 C5 172.8(3) . . . . ?
Ru C3 C4 C5 -60.6(2) . . . . ?
C2 C3 C4 C14 -170.3(3) . . . . ?
C13 C3 C4 C14 0.8(5) . . . . ?
Ru C3 C4 C14 127.5(3) . . . . ?
C2 C3 C4 Ru 62.2(2) . . . . ?
C13 C3 C4 Ru -126.6(3) . . . . ?
O1 Ru C4 C5 -27.0(2) . . . . ?
C2L Ru C4 C5 -136.6(2) . . . . ?
C1L Ru C4 C5 -171.8(2) . . . . ?
C1 Ru C4 C5 38.66(19) . . . . ?
C3 Ru C4 C5 117.3(3) . . . . ?
C2 Ru C4 C5 80.5(2) . . . . ?
C3L Ru C4 C5 -108.0(2) . . . . ?
Cl Ru C4 C5 103.1(2) . . . . ?
O1 Ru C4 C3 -144.31(17) . . . . ?
C2L Ru C4 C3 106.1(2) . . . . ?
C1L Ru C4 C3 70.9(2) . . . . ?
C5 Ru C4 C3 -117.3(3) . . . . ?
C1 Ru C4 C3 -78.6(2) . . . . ?
C2 Ru C4 C3 -36.76(18) . . . . ?
C3L Ru C4 C3 134.69(19) . . . . ?
Cl Ru C4 C3 -14.2(3) . . . . ?
O1 Ru C4 C14 94.8(3) . . . . ?
C2L Ru C4 C14 -14.7(3) . . . . ?
C1L Ru C4 C14 -49.9(3) . . . . ?
C5 Ru C4 C14 121.9(4) . . . . ?
C1 Ru C4 C14 160.5(3) . . . . ?
C3 Ru C4 C14 -120.8(4) . . . . ?
C2 Ru C4 C14 -157.6(3) . . . . ?
C3L Ru C4 C14 13.8(3) . . . . ?
Cl Ru C4 C14 -135.1(3) . . . . ?
C3 C4 C5 C1 -0.6(4) . . . . ?
C14 C4 C5 C1 171.1(3) . . . . ?
Ru C4 C5 C1 -63.2(2) . . . . ?
C3 C4 C5 C15 -174.3(3) . . . . ?
C14 C4 C5 C15 -2.7(6) . . . . ?
Ru C4 C5 C15 123.0(3) . . . . ?
C3 C4 C5 Ru 62.7(2) . . . . ?
C14 C4 C5 Ru -125.7(3) . . . . ?
C2 C1 C5 C4 -0.7(4) . . . . ?
C11 C1 C5 C4 -177.5(3) . . . . ?
Ru C1 C5 C4 64.3(2) . . . . ?
C2 C1 C5 C15 173.2(3) . . . . ?
C11 C1 C5 C15 -3.6(5) . . . . ?
Ru C1 C5 C15 -121.7(3) . . . . ?
C2 C1 C5 Ru -65.1(2) . . . . ?
C11 C1 C5 Ru 118.1(3) . . . . ?
O1 Ru C5 C4 156.4(2) . . . . ?
C2L Ru C5 C4 64.5(3) . . . . ?
C1L Ru C5 C4 11.1(3) . . . . ?
C1 Ru C5 C4 -116.4(3) . . . . ?
C3 Ru C5 C4 -37.40(18) . . . . ?
C2 Ru C5 C4 -78.8(2) . . . . ?
C3L Ru C5 C4 75.0(2) . . . . ?
Cl Ru C5 C4 -127.66(17) . . . . ?
O1 Ru C5 C1 -87.18(18) . . . . ?
C2L Ru C5 C1 -179.05(19) . . . . ?
C1L Ru C5 C1 127.5(2) . . . . ?
C4 Ru C5 C1 116.4(3) . . . . ?
C3 Ru C5 C1 79.0(2) . . . . ?
C2 Ru C5 C1 37.63(19) . . . . ?
C3L Ru C5 C1 -168.59(18) . . . . ?
Cl Ru C5 C1 -11.2(2) . . . . ?
O1 Ru C5 C15 32.6(3) . . . . ?
C2L Ru C5 C15 -59.2(3) . . . . ?
C1L Ru C5 C15 -112.6(3) . . . . ?
C1 Ru C5 C15 119.8(4) . . . . ?
C4 Ru C5 C15 -123.7(4) . . . . ?
C3 Ru C5 C15 -161.1(3) . . . . ?
C2 Ru C5 C15 157.5(3) . . . . ?
C3L Ru C5 C15 -48.8(3) . . . . ?
Cl Ru C5 C15 108.6(3) . . . . ?
 
_diffrn_measured_fraction_theta_max    0.993
_diffrn_reflns_theta_full              26.62
_diffrn_measured_fraction_theta_full   0.993
_refine_diff_density_max    0.688
_refine_diff_density_min   -0.513
_refine_diff_density_rms    0.101

#===END

data_preg110
 
_audit_creation_method            SHELXL-97
_publ_contact_author_name         P.S.Pregosin
_publ_contact_author_address      
'Lab. Inorganic Chemistry - ETHZ, CH-8093 Zuerich'
_publ_contact_author_email        pregosin@inorg.chem.ethz.ch
loop_
 _publ_author_name 
'I. Fernadez'
'P. S. Pregosin'
'A. Albinati'
'S. Rizzato'
_publ_requested_journal           'Organometallics' 
_publ_section_title
;
 X-ray Diffraction, PGSE Diffusion and Related NMR Studies on a Series 
 of Cp*-Based Ru(IV)(Cp*)(eta3-CH2-CH-CHPh) Allyl Complexes.
;
_compound_number                  '2c' 
_chemical_formula_sum
 'C24 H33 Cl F6 N P Ru'
_chemical_formula_weight          617.00
 
loop_
 _atom_type_symbol
 _atom_type_description
 _atom_type_scat_dispersion_real
 _atom_type_scat_dispersion_imag
 _atom_type_scat_source
 'C'  'C'   0.0033   0.0016
 'International Tables Vol C Tables 4.2.6.8 and 6.1.1.4'
 'H'  'H'   0.0000   0.0000
 'International Tables Vol C Tables 4.2.6.8 and 6.1.1.4'
 'N'  'N'   0.0061   0.0033
 'International Tables Vol C Tables 4.2.6.8 and 6.1.1.4'
 'F'  'F'   0.0171   0.0103
 'International Tables Vol C Tables 4.2.6.8 and 6.1.1.4'
 'P'  'P'   0.1023   0.0942
 'International Tables Vol C Tables 4.2.6.8 and 6.1.1.4'
 'Cl'  'Cl'   0.1484   0.1585
 'International Tables Vol C Tables 4.2.6.8 and 6.1.1.4'
 'Ru'  'Ru'  -1.2594   0.8363
 'International Tables Vol C Tables 4.2.6.8 and 6.1.1.4'
 
_symmetry_cell_setting            Monoclinic
_symmetry_space_group_name_H-M    P21/n
 
loop_
 _symmetry_equiv_pos_as_xyz
 'x, y, z'
 '-x+1/2, y+1/2, -z+1/2'
 '-x, -y, -z'
 'x-1/2, -y-1/2, z-1/2'
 
_cell_length_a                    8.4912(4)
_cell_length_b                    14.6540(6)
_cell_length_c                    21.1911(9)
_cell_angle_alpha                 90.00
_cell_angle_beta                  97.8220(10)
_cell_angle_gamma                 90.00
_cell_volume                      2612.3(2)
_cell_formula_units_Z             4
_cell_measurement_temperature     110(2)
_cell_measurement_reflns_used     9821
_cell_measurement_theta_min       2.4
_cell_measurement_theta_max       26.0
 
_exptl_crystal_description        'red'
_exptl_crystal_colour             'prismatic'
_exptl_crystal_size_max           0.24
_exptl_crystal_size_mid           0.16
_exptl_crystal_size_min           0.12

_exptl_crystal_density_diffrn     1.569
_exptl_crystal_density_method     'not measured'
_exptl_crystal_F_000              1256
_exptl_absorpt_coefficient_mu     0.820
_exptl_absorpt_correction_type    'empirical, multi scan'
_exptl_absorpt_correction_T_min   0.80243
_exptl_absorpt_correction_T_max   1.00000
_exptl_absorpt_process_details    'Sadabs 2.01 (Bruker AXS, 1999)'
 
_exptl_special_details
;
 1800 frames were collected on a Brucker APEX CCD diffractometer with a 
 sample to detector distance of 47.30 mm. The counting time per frame 
 was 30 sec and the scan width per frame 0.3 deg. 
;
 
_diffrn_ambient_temperature       110(2)
_diffrn_radiation_wavelength      0.71073
_diffrn_radiation_type            MoK\a
_diffrn_radiation_source          'fine-focus sealed tube'
_diffrn_radiation_monochromator   graphite
_diffrn_measurement_device_type   'Bruker SMART CCD'
_diffrn_measurement_method        'phi and omega scans'
 
_diffrn_reflns_number             18232
_diffrn_reflns_av_R_equivalents   0.0287
_diffrn_reflns_av_sigmaI/netI     0.0281
_diffrn_reflns_limit_h_min        -10
_diffrn_reflns_limit_h_max        10
_diffrn_reflns_limit_k_min        -18
_diffrn_reflns_limit_k_max        18
_diffrn_reflns_limit_l_min        -26
_diffrn_reflns_limit_l_max        26
_diffrn_reflns_theta_min          1.69
_diffrn_reflns_theta_max          26.03
_reflns_number_total              5144
_reflns_number_gt                 4692
_reflns_threshold_expression      >2sigma(I)
 
_computing_data_collection        'SMART      (Bruker AXS, 2001)'
_computing_cell_refinement        'SAINTPLUS  (Bruker AXS, 1999)'
_computing_data_reduction         'SAINTPLUS  (Bruker AXS, 1999)'
_computing_structure_solution     'SHELXS-97 (Sheldrick, 1990)'
_computing_structure_refinement   'SHELXL-97 (Sheldrick, 1997)'
_computing_molecular_graphics     
 'ORTEP for Windows v1.074 (L.J. Farrugia 1997)'
_computing_publication_material  
  'WinGX v1.64.05(L.J. Farrugia,J. Appl. Cryst.,1999,32, 837)'
 
_refine_special_details
;
 Refinement of F^2^ against ALL reflections.  The weighted R-factor wR and
 goodness of fit S are based on F^2^, conventional R-factors R are based
 on F, with F set to zero for negative F^2^. The threshold expression of
 F^2^ > 2sigma(F^2^) is used only for calculating R-factors(gt) etc. and is
 not relevant to the choice of reflections for refinement.  R-factors based
 on F^2^ are statistically about twice as large as those based on F, and R-
 factors based on ALL data will be even larger.
;
 
_refine_ls_structure_factor_coef  Fsqd
_refine_ls_matrix_type            full
_refine_ls_weighting_scheme       calc
_refine_ls_weighting_details
 'calc w=1/[\s^2^(Fo^2^)+(0.0485P)^2^+2.1138P] where P=(Fo^2^+2Fc^2^)/3'
_atom_sites_solution_primary      direct
_atom_sites_solution_secondary    difmap
_atom_sites_solution_hydrogens    geom
_refine_ls_hydrogen_treatment     mixed
_refine_ls_extinction_method      none
_refine_ls_extinction_coef        'not refined'
_refine_ls_number_reflns          5144
_refine_ls_number_parameters      388
_refine_ls_number_restraints      0
_refine_ls_R_factor_all           0.0344
_refine_ls_R_factor_gt            0.0312
_refine_ls_wR_factor_ref          0.0839
_refine_ls_wR_factor_gt           0.0818
_refine_ls_goodness_of_fit_ref    1.049
_refine_ls_restrained_S_all       1.049
_refine_ls_shift/su_max           0.055
_refine_ls_shift/su_mean          0.001
 
loop_
 _atom_site_label
 _atom_site_type_symbol
 _atom_site_fract_x
 _atom_site_fract_y
 _atom_site_fract_z
 _atom_site_U_iso_or_equiv
 _atom_site_adp_type
 _atom_site_occupancy
 _atom_site_symmetry_multiplicity
 _atom_site_calc_flag
 _atom_site_refinement_flags
 _atom_site_disorder_assembly
 _atom_site_disorder_group
Ru Ru 0.31492(2) 0.199911(11) 0.037843(8) 0.01844(8) Uani 1 1 d . . .
Cl Cl 0.59707(7) 0.17298(5) 0.04559(3) 0.03622(16) Uani 1 1 d . . .
C1L C 0.3229(4) 0.07342(17) 0.09207(13) 0.0298(5) Uani 1 1 d . . .
C2L C 0.2889(3) 0.05358(16) 0.02642(12) 0.0269(5) Uani 1 1 d . . .
C3L C 0.1462(3) 0.08626(15) -0.00670(12) 0.0248(5) Uani 1 1 d . . .
C111 C 0.1021(3) 0.07484(15) -0.07620(11) 0.0241(5) Uani 1 1 d . . .
C112 C -0.0506(3) 0.09735(17) -0.10431(12) 0.0280(5) Uani 1 1 d . . .
C113 C -0.0971(3) 0.08241(18) -0.16878(13) 0.0329(6) Uani 1 1 d . . .
C114 C 0.0072(4) 0.04514(17) -0.20578(13) 0.0333(6) Uani 1 1 d . . .
C115 C 0.1601(3) 0.02303(18) -0.17905(13) 0.0333(6) Uani 1 1 d . . .
C116 C 0.2073(3) 0.03777(17) -0.11464(13) 0.0294(5) Uani 1 1 d . . .
C1 C 0.2680(3) 0.35217(16) 0.04070(11) 0.0250(5) Uani 1 1 d . . .
C2 C 0.3742(3) 0.32891(16) 0.09537(11) 0.0252(5) Uani 1 1 d . . .
C3 C 0.2986(3) 0.26269(16) 0.13099(11) 0.0240(5) Uani 1 1 d . . .
C4 C 0.1405(3) 0.24775(16) 0.09820(11) 0.0241(5) Uani 1 1 d . . .
C5 C 0.1230(3) 0.30117(15) 0.04130(12) 0.0239(5) Uani 1 1 d . . .
C11 C 0.2960(4) 0.42313(17) -0.00708(13) 0.0350(6) Uani 1 1 d . . .
H11A H 0.2755 0.4825 0.0092 0.042 Uiso 1 1 calc R . .
H11B H 0.2261 0.4126 -0.0460 0.042 Uiso 1 1 calc R . .
H11C H 0.4043 0.4199 -0.0152 0.042 Uiso 1 1 calc R . .
C12 C 0.5353(3) 0.36920(19) 0.11399(14) 0.0363(6) Uani 1 1 d . . .
H12A H 0.5849 0.3797 0.0765 0.044 Uiso 1 1 calc R . .
H12B H 0.5992 0.3278 0.1418 0.044 Uiso 1 1 calc R . .
H12C H 0.5255 0.4260 0.1357 0.044 Uiso 1 1 calc R . .
C13 C 0.3659(3) 0.22778(19) 0.19523(12) 0.0330(6) Uani 1 1 d . . .
H13A H 0.4745 0.2098 0.1947 0.040 Uiso 1 1 calc R . .
H13B H 0.3052 0.1762 0.2059 0.040 Uiso 1 1 calc R . .
H13C H 0.3615 0.2750 0.2263 0.040 Uiso 1 1 calc R . .
C14 C 0.0091(3) 0.19898(18) 0.12423(14) 0.0342(6) Uani 1 1 d . . .
H14A H -0.0529 0.2421 0.1445 0.041 Uiso 1 1 calc R . .
H14B H 0.0532 0.1544 0.1548 0.041 Uiso 1 1 calc R . .
H14C H -0.0574 0.1691 0.0901 0.041 Uiso 1 1 calc R . .
C15 C -0.0260(3) 0.31358(19) -0.00447(14) 0.0343(6) Uani 1 1 d . . .
H15A H -0.0993 0.2654 0.0013 0.041 Uiso 1 1 calc R . .
H15B H -0.0010 0.3119 -0.0473 0.041 Uiso 1 1 calc R . .
H15C H -0.0732 0.3713 0.0032 0.041 Uiso 1 1 calc R . .
N1A N 0.3424(2) 0.22645(13) -0.05590(10) 0.0234(4) Uani 1 1 d . . .
C1A C 0.3689(3) 0.24687(16) -0.10509(12) 0.0252(5) Uani 1 1 d . . .
C2A C 0.4141(3) 0.27311(18) -0.16743(12) 0.0303(5) Uani 1 1 d . . .
C3A C 0.2718(4) 0.2621(2) -0.21887(13) 0.0420(7) Uani 1 1 d . . .
H3A1 H 0.2406 0.1992 -0.2218 0.050 Uiso 1 1 calc R . .
H3A2 H 0.3001 0.2820 -0.2590 0.050 Uiso 1 1 calc R . .
H3A3 H 0.1850 0.2984 -0.2082 0.050 Uiso 1 1 calc R . .
C4A C 0.4673(5) 0.3727(2) -0.16320(16) 0.0524(8) Uani 1 1 d . . .
H4A1 H 0.3798 0.4106 -0.1555 0.063 Uiso 1 1 calc R . .
H4A2 H 0.5028 0.3905 -0.2025 0.063 Uiso 1 1 calc R . .
H4A3 H 0.5529 0.3797 -0.1289 0.063 Uiso 1 1 calc R . .
C5A C 0.5492(4) 0.2105(2) -0.17985(17) 0.0533(9) Uani 1 1 d . . .
H5A1 H 0.6364 0.2174 -0.1463 0.064 Uiso 1 1 calc R . .
H5A2 H 0.5833 0.2263 -0.2198 0.064 Uiso 1 1 calc R . .
H5A3 H 0.5131 0.1484 -0.1813 0.064 Uiso 1 1 calc R . .
H1A H 0.423(4) 0.059(2) 0.1151(14) 0.033(8) Uiso 1 1 d . . .
H1B H 0.241(3) 0.0740(18) 0.1123(13) 0.023(7) Uiso 1 1 d . . .
H2 H 0.373(3) 0.0261(18) 0.0052(13) 0.024(7) Uiso 1 1 d . . .
H3 H 0.060(3) 0.0971(19) 0.0162(13) 0.031(7) Uiso 1 1 d . . .
H116 H 0.301(4) 0.0238(19) -0.0992(13) 0.027(7) Uiso 1 1 d . . .
H115 H 0.226(4) -0.003(2) -0.2053(17) 0.056(10) Uiso 1 1 d . . .
H114 H -0.030(4) 0.040(2) -0.2462(16) 0.039(8) Uiso 1 1 d . . .
H113 H -0.196(4) 0.0925(19) -0.1838(13) 0.027(7) Uiso 1 1 d . . .
H112 H -0.124(3) 0.1224(18) -0.0793(12) 0.022(6) Uiso 1 1 d . . .
P P 0.95597(8) 0.49922(5) 0.82553(3) 0.03110(16) Uani 1 1 d . . .
F1 F 0.8626(5) 0.5888(2) 0.80414(13) 0.0510(12) Uani 0.658(7) 1 d P A 1
F2 F 0.8021(4) 0.4400(3) 0.7965(2) 0.0824(16) Uani 0.658(7) 1 d P A 1
F3 F 1.0404(5) 0.4040(3) 0.8461(2) 0.0606(14) Uani 0.658(7) 1 d P A 1
F4 F 1.1003(7) 0.5515(3) 0.8531(4) 0.133(3) Uani 0.658(7) 1 d P A 1
F1B F 0.7809(7) 0.5206(8) 0.8223(4) 0.099(4) Uani 0.342(7) 1 d P A 1
F2B F 0.9338(18) 0.3992(5) 0.8347(5) 0.093(5) Uani 0.342(7) 1 d P A 1
F3B F 1.1427(8) 0.4871(10) 0.8313(5) 0.117(5) Uani 0.342(7) 1 d P A 1
F4B F 0.9885(19) 0.6078(4) 0.8182(4) 0.101(5) Uani 0.342(7) 1 d P A 1
F5 F 0.9894(4) 0.48817(16) 0.75475(11) 0.0894(9) Uani 1 1 d . A 1
F6 F 0.9211(6) 0.5077(2) 0.89525(12) 0.1474(19) Uani 1 1 d . A 1
 
loop_
 _atom_site_aniso_label
 _atom_site_aniso_U_11
 _atom_site_aniso_U_22
 _atom_site_aniso_U_33
 _atom_site_aniso_U_23
 _atom_site_aniso_U_13
 _atom_site_aniso_U_12
Ru 0.02130(12) 0.01529(11) 0.01840(12) 0.00010(6) 0.00153(8) 0.00000(6)
Cl 0.0232(3) 0.0345(3) 0.0494(4) -0.0055(3) -0.0008(3) 0.0043(3)
C1L 0.0398(15) 0.0195(12) 0.0284(13) 0.0042(10) -0.0011(12) -0.0008(11)
C2L 0.0371(13) 0.0127(10) 0.0301(13) -0.0001(9) 0.0017(11) -0.0009(10)
C3L 0.0296(12) 0.0181(11) 0.0271(12) -0.0013(9) 0.0055(10) -0.0061(9)
C111 0.0302(12) 0.0164(10) 0.0251(12) 0.0003(9) 0.0020(10) -0.0066(9)
C112 0.0304(13) 0.0252(12) 0.0288(12) -0.0009(10) 0.0050(11) -0.0013(10)
C113 0.0334(15) 0.0292(13) 0.0334(14) 0.0013(11) -0.0050(11) -0.0014(11)
C114 0.0511(17) 0.0238(12) 0.0240(13) -0.0026(10) 0.0011(12) -0.0061(12)
C115 0.0421(15) 0.0267(13) 0.0320(14) -0.0061(11) 0.0077(12) -0.0002(11)
C116 0.0308(14) 0.0241(12) 0.0322(14) -0.0028(10) 0.0002(11) 0.0014(10)
C1 0.0372(13) 0.0168(11) 0.0221(11) -0.0029(9) 0.0078(10) 0.0053(10)
C2 0.0326(13) 0.0186(11) 0.0248(12) -0.0057(9) 0.0056(10) -0.0009(10)
C3 0.0313(12) 0.0201(11) 0.0209(11) -0.0033(9) 0.0043(10) 0.0014(9)
C4 0.0278(12) 0.0227(11) 0.0228(11) -0.0002(9) 0.0064(10) 0.0032(9)
C5 0.0275(12) 0.0219(12) 0.0226(12) -0.0005(9) 0.0047(10) 0.0062(9)
C11 0.0543(17) 0.0191(12) 0.0333(14) 0.0022(10) 0.0120(13) 0.0023(11)
C12 0.0383(15) 0.0311(14) 0.0390(15) -0.0083(11) 0.0034(12) -0.0101(11)
C13 0.0429(15) 0.0322(13) 0.0223(12) -0.0009(10) -0.0010(11) 0.0012(12)
C14 0.0302(14) 0.0405(15) 0.0335(15) 0.0040(11) 0.0095(12) -0.0030(11)
C15 0.0336(14) 0.0347(14) 0.0331(14) 0.0010(11) -0.0010(12) 0.0097(11)
N1A 0.0269(10) 0.0206(9) 0.0233(10) -0.0031(8) 0.0061(8) -0.0037(8)
C1A 0.0293(12) 0.0191(11) 0.0279(13) -0.0028(9) 0.0061(10) -0.0006(9)
C2A 0.0363(14) 0.0312(13) 0.0257(12) 0.0023(10) 0.0121(11) 0.0004(11)
C3A 0.0498(18) 0.0491(17) 0.0272(14) 0.0037(12) 0.0057(13) -0.0006(14)
C4A 0.072(2) 0.0440(18) 0.0435(17) 0.0072(14) 0.0173(16) -0.0210(16)
C5A 0.053(2) 0.070(2) 0.0419(18) 0.0082(15) 0.0240(16) 0.0224(16)
P 0.0359(4) 0.0310(3) 0.0261(3) -0.0009(3) 0.0032(3) 0.0088(3)
F1 0.080(3) 0.040(2) 0.0310(14) -0.0008(13) -0.0008(16) 0.0294(19)
F2 0.051(2) 0.061(2) 0.133(4) -0.021(2) 0.008(2) -0.0106(17)
F3 0.081(3) 0.048(2) 0.052(2) 0.0068(16) 0.007(2) 0.036(2)
F4 0.088(4) 0.076(3) 0.208(7) -0.020(4) -0.075(4) -0.023(3)
F1B 0.032(3) 0.153(10) 0.111(7) -0.055(6) 0.005(4) 0.008(4)
F2B 0.201(15) 0.029(3) 0.063(6) -0.002(4) 0.064(9) -0.016(7)
F3B 0.037(4) 0.195(13) 0.121(7) -0.087(8) 0.017(4) 0.015(5)
F4B 0.227(14) 0.027(3) 0.058(5) -0.012(3) 0.052(7) -0.030(6)
F5 0.171(3) 0.0541(13) 0.0541(13) 0.0046(10) 0.0552(16) 0.0164(15)
F6 0.322(5) 0.0852(19) 0.0500(14) 0.0239(13) 0.081(2) 0.116(3)
 
_geom_special_details
;
 All esds (except the esd in the dihedral angle between two l.s. planes)
 are estimated using the full covariance matrix.  The cell esds are taken
 into account individually in the estimation of esds in distances, angles
 and torsion angles; correlations between esds in cell parameters are only
 used when they are defined by crystal symmetry.  An approximate (isotropic)
 treatment of cell esds is used for estimating esds involving l.s. planes.
;
 
loop_
 _geom_bond_atom_site_label_1
 _geom_bond_atom_site_label_2
 _geom_bond_distance
 _geom_bond_site_symmetry_2
 _geom_bond_publ_flag
Ru N1A 2.068(2) . ?
Ru C2L 2.166(2) . ?
Ru C1L 2.177(2) . ?
Ru C4 2.199(2) . ?
Ru C3 2.199(2) . ?
Ru C5 2.212(2) . ?
Ru C2 2.268(2) . ?
Ru C1 2.269(2) . ?
Ru C3L 2.313(2) . ?
Ru Cl 2.4115(6) . ?
C1L C2L 1.412(4) . ?
C1L H1A 0.94(3) . ?
C1L H1B 0.86(3) . ?
C2L C3L 1.399(4) . ?
C2L H2 0.98(3) . ?
C3L C111 1.479(3) . ?
C3L H3 0.94(3) . ?
C111 C112 1.391(4) . ?
C111 C116 1.398(4) . ?
C112 C113 1.387(4) . ?
C112 H112 0.94(3) . ?
C113 C114 1.374(4) . ?
C113 H113 0.87(3) . ?
C114 C115 1.382(4) . ?
C114 H114 0.87(3) . ?
C115 C116 1.386(4) . ?
C115 H115 0.92(4) . ?
C116 H116 0.85(3) . ?
C1 C2 1.410(4) . ?
C1 C5 1.441(4) . ?
C1 C11 1.493(3) . ?
C2 C3 1.434(3) . ?
C2 C12 1.493(4) . ?
C3 C4 1.442(3) . ?
C3 C13 1.493(3) . ?
C4 C5 1.428(3) . ?
C4 C14 1.492(3) . ?
C5 C15 1.497(4) . ?
C11 H11A 0.9600 . ?
C11 H11B 0.9600 . ?
C11 H11C 0.9600 . ?
C12 H12A 0.9600 . ?
C12 H12B 0.9600 . ?
C12 H12C 0.9600 . ?
C13 H13A 0.9600 . ?
C13 H13B 0.9600 . ?
C13 H13C 0.9600 . ?
C14 H14A 0.9600 . ?
C14 H14B 0.9600 . ?
C14 H14C 0.9600 . ?
C15 H15A 0.9600 . ?
C15 H15B 0.9600 . ?
C15 H15C 0.9600 . ?
N1A C1A 1.136(3) . ?
C1A C2A 1.476(3) . ?
C2A C5A 1.519(4) . ?
C2A C3A 1.522(4) . ?
C2A C4A 1.527(4) . ?
C3A H3A1 0.9600 . ?
C3A H3A2 0.9600 . ?
C3A H3A3 0.9600 . ?
C4A H4A1 0.9600 . ?
C4A H4A2 0.9600 . ?
C4A H4A3 0.9600 . ?
C5A H5A1 0.9600 . ?
C5A H5A2 0.9600 . ?
C5A H5A3 0.9600 . ?
P F2B 1.494(8) . ?
P F4 1.494(4) . ?
P F1B 1.512(6) . ?
P F6 1.551(2) . ?
P F1 1.569(3) . ?
P F5 1.573(2) . ?
P F3B 1.584(7) . ?
P F3 1.601(4) . ?
P F2 1.619(4) . ?
P F4B 1.626(6) . ?
F1 F4B 1.106(14) . ?
F1 F1B 1.304(11) . ?
F2 F1B 1.325(9) . ?
F2 F2B 1.421(15) . ?
F3 F2B 0.907(13) . ?
F3 F3B 1.552(14) . ?
F4 F3B 1.130(9) . ?
F4 F4B 1.391(13) . ?
 
loop_
 _geom_angle_atom_site_label_1
 _geom_angle_atom_site_label_2
 _geom_angle_atom_site_label_3
 _geom_angle
 _geom_angle_site_symmetry_1
 _geom_angle_site_symmetry_3
 _geom_angle_publ_flag
N1A Ru C2L 95.85(9) . . ?
N1A Ru C1L 131.88(9) . . ?
C2L Ru C1L 37.95(9) . . ?
N1A Ru C4 132.18(8) . . ?
C2L Ru C4 108.30(9) . . ?
C1L Ru C4 86.52(10) . . ?
N1A Ru C3 144.34(8) . . ?
C2L Ru C3 119.77(9) . . ?
C1L Ru C3 83.32(9) . . ?
C4 Ru C3 38.27(9) . . ?
N1A Ru C5 94.90(8) . . ?
C2L Ru C5 127.11(9) . . ?
C1L Ru C5 121.58(10) . . ?
C4 Ru C5 37.78(9) . . ?
C3 Ru C5 63.45(9) . . ?
N1A Ru C2 108.28(8) . . ?
C2L Ru C2 153.76(9) . . ?
C1L Ru C2 115.92(10) . . ?
C4 Ru C2 62.59(9) . . ?
C3 Ru C2 37.39(9) . . ?
C5 Ru C2 62.21(9) . . ?
N1A Ru C1 83.33(8) . . ?
C2L Ru C1 163.94(10) . . ?
C1L Ru C1 144.70(9) . . ?
C4 Ru C1 62.38(9) . . ?
C3 Ru C1 62.09(8) . . ?
C5 Ru C1 37.50(9) . . ?
C2 Ru C1 36.20(9) . . ?
N1A Ru C3L 83.56(8) . . ?
C2L Ru C3L 36.23(9) . . ?
C1L Ru C3L 64.87(9) . . ?
C4 Ru C3L 92.18(9) . . ?
C3 Ru C3L 123.80(9) . . ?
C5 Ru C3L 94.50(9) . . ?
C2 Ru C3L 154.05(9) . . ?
C1 Ru C3L 128.15(9) . . ?
N1A Ru Cl 81.69(6) . . ?
C2L Ru Cl 86.04(7) . . ?
C1L Ru Cl 82.28(8) . . ?
C4 Ru Cl 138.94(7) . . ?
C3 Ru Cl 101.00(7) . . ?
C5 Ru Cl 146.81(7) . . ?
C2 Ru Cl 87.37(7) . . ?
C1 Ru Cl 109.61(7) . . ?
C3L Ru Cl 117.67(6) . . ?
C2L C1L Ru 70.59(14) . . ?
C2L C1L H1A 120.9(18) . . ?
Ru C1L H1A 115.1(18) . . ?
C2L C1L H1B 114.8(18) . . ?
Ru C1L H1B 106.5(18) . . ?
H1A C1L H1B 118(3) . . ?
C3L C2L C1L 118.1(2) . . ?
C3L C2L Ru 77.61(14) . . ?
C1L C2L Ru 71.46(14) . . ?
C3L C2L H2 123.1(16) . . ?
C1L C2L H2 118.1(16) . . ?
Ru C2L H2 112.8(15) . . ?
C2L C3L C111 123.0(2) . . ?
C2L C3L Ru 66.16(13) . . ?
C111 C3L Ru 123.14(15) . . ?
C2L C3L H3 118.5(17) . . ?
C111 C3L H3 115.0(17) . . ?
Ru C3L H3 98.5(17) . . ?
C112 C111 C116 118.3(2) . . ?
C112 C111 C3L 119.6(2) . . ?
C116 C111 C3L 121.9(2) . . ?
C113 C112 C111 120.6(2) . . ?
C113 C112 H112 119.5(16) . . ?
C111 C112 H112 119.9(16) . . ?
C114 C113 C112 120.4(3) . . ?
C114 C113 H113 121.6(19) . . ?
C112 C113 H113 117.8(19) . . ?
C113 C114 C115 120.1(3) . . ?
C113 C114 H114 115(2) . . ?
C115 C114 H114 125(2) . . ?
C114 C115 C116 119.8(3) . . ?
C114 C115 H115 117(2) . . ?
C116 C115 H115 123(2) . . ?
C115 C116 C111 120.8(3) . . ?
C115 C116 H116 118.3(19) . . ?
C111 C116 H116 120.9(19) . . ?
C2 C1 C5 108.6(2) . . ?
C2 C1 C11 125.6(2) . . ?
C5 C1 C11 125.6(2) . . ?
C2 C1 Ru 71.89(13) . . ?
C5 C1 Ru 69.12(12) . . ?
C11 C1 Ru 128.47(16) . . ?
C1 C2 C3 108.3(2) . . ?
C1 C2 C12 125.6(2) . . ?
C3 C2 C12 126.0(2) . . ?
C1 C2 Ru 71.91(13) . . ?
C3 C2 Ru 68.68(13) . . ?
C12 C2 Ru 126.86(17) . . ?
C2 C3 C4 107.7(2) . . ?
C2 C3 C13 124.6(2) . . ?
C4 C3 C13 127.1(2) . . ?
C2 C3 Ru 73.93(13) . . ?
C4 C3 Ru 70.87(13) . . ?
C13 C3 Ru 127.72(17) . . ?
C5 C4 C3 107.8(2) . . ?
C5 C4 C14 125.3(2) . . ?
C3 C4 C14 126.0(2) . . ?
C5 C4 Ru 71.61(13) . . ?
C3 C4 Ru 70.86(13) . . ?
C14 C4 Ru 131.21(18) . . ?
C4 C5 C1 107.5(2) . . ?
C4 C5 C15 126.5(2) . . ?
C1 C5 C15 125.4(2) . . ?
C4 C5 Ru 70.61(13) . . ?
C1 C5 Ru 73.38(13) . . ?
C15 C5 Ru 128.41(17) . . ?
C1 C11 H11A 109.5 . . ?
C1 C11 H11B 109.5 . . ?
H11A C11 H11B 109.5 . . ?
C1 C11 H11C 109.5 . . ?
H11A C11 H11C 109.5 . . ?
H11B C11 H11C 109.5 . . ?
C2 C12 H12A 109.5 . . ?
C2 C12 H12B 109.5 . . ?
H12A C12 H12B 109.5 . . ?
C2 C12 H12C 109.5 . . ?
H12A C12 H12C 109.5 . . ?
H12B C12 H12C 109.5 . . ?
C3 C13 H13A 109.5 . . ?
C3 C13 H13B 109.5 . . ?
H13A C13 H13B 109.5 . . ?
C3 C13 H13C 109.5 . . ?
H13A C13 H13C 109.5 . . ?
H13B C13 H13C 109.5 . . ?
C4 C14 H14A 109.5 . . ?
C4 C14 H14B 109.5 . . ?
H14A C14 H14B 109.5 . . ?
C4 C14 H14C 109.5 . . ?
H14A C14 H14C 109.5 . . ?
H14B C14 H14C 109.5 . . ?
C5 C15 H15A 109.5 . . ?
C5 C15 H15B 109.5 . . ?
H15A C15 H15B 109.5 . . ?
C5 C15 H15C 109.5 . . ?
H15A C15 H15C 109.5 . . ?
H15B C15 H15C 109.5 . . ?
C1A N1A Ru 173.2(2) . . ?
N1A C1A C2A 176.4(3) . . ?
C1A C2A C5A 107.0(2) . . ?
C1A C2A C3A 109.6(2) . . ?
C5A C2A C3A 110.9(3) . . ?
C1A C2A C4A 107.9(2) . . ?
C5A C2A C4A 111.3(3) . . ?
C3A C2A C4A 110.0(3) . . ?
C2A C3A H3A1 109.5 . . ?
C2A C3A H3A2 109.5 . . ?
H3A1 C3A H3A2 109.5 . . ?
C2A C3A H3A3 109.5 . . ?
H3A1 C3A H3A3 109.5 . . ?
H3A2 C3A H3A3 109.5 . . ?
C2A C4A H4A1 109.5 . . ?
C2A C4A H4A2 109.5 . . ?
H4A1 C4A H4A2 109.5 . . ?
C2A C4A H4A3 109.5 . . ?
H4A1 C4A H4A3 109.5 . . ?
H4A2 C4A H4A3 109.5 . . ?
C2A C5A H5A1 109.5 . . ?
C2A C5A H5A2 109.5 . . ?
H5A1 C5A H5A2 109.5 . . ?
C2A C5A H5A3 109.5 . . ?
H5A1 C5A H5A3 109.5 . . ?
H5A2 C5A H5A3 109.5 . . ?
F2B P F4 124.2(6) . . ?
F2B P F1B 94.0(7) . . ?
F4 P F1B 131.3(5) . . ?
F2B P F6 84.9(3) . . ?
F4 P F6 80.8(4) . . ?
F1B P F6 73.3(4) . . ?
F2B P F1 142.3(6) . . ?
F4 P F1 92.2(3) . . ?
F1B P F1 50.1(4) . . ?
F6 P F1 93.08(14) . . ?
F2B P F5 93.8(3) . . ?
F4 P F5 100.4(4) . . ?
F1B P F5 106.4(4) . . ?
F6 P F5 178.56(19) . . ?
F1 P F5 87.73(14) . . ?
F2B P F3B 91.3(7) . . ?
F4 P F3B 43.0(4) . . ?
F1B P F3B 174.2(6) . . ?
F6 P F3B 104.7(4) . . ?
F1 P F3B 125.3(6) . . ?
F5 P F3B 75.7(4) . . ?
F2B P F3 33.8(5) . . ?
F4 P F3 91.6(3) . . ?
F1B P F3 126.4(5) . . ?
F6 P F3 86.96(19) . . ?
F1 P F3 176.1(3) . . ?
F5 P F3 92.16(19) . . ?
F3B P F3 58.3(5) . . ?
F2B P F2 54.1(6) . . ?
F4 P F2 178.4(3) . . ?
F1B P F2 49.9(4) . . ?
F6 P F2 99.0(3) . . ?
F1 P F2 89.4(2) . . ?
F5 P F2 79.8(2) . . ?
F3B P F2 135.8(5) . . ?
F3 P F2 86.8(2) . . ?
F2B P F4B 177.0(7) . . ?
F4 P F4B 52.8(5) . . ?
F1B P F4B 88.4(7) . . ?
F6 P F4B 94.0(3) . . ?
F1 P F4B 40.5(5) . . ?
F5 P F4B 87.4(3) . . ?
F3B P F4B 86.3(7) . . ?
F3 P F4B 143.4(6) . . ?
F2 P F4B 128.9(6) . . ?
F4B F1 F1B 130.3(6) . . ?
F4B F1 P 72.6(5) . . ?
F1B F1 P 62.7(4) . . ?
F1B F2 F2B 106.3(6) . . ?
F1B F2 P 60.8(3) . . ?
F2B F2 P 58.4(4) . . ?
F2B F3 F3B 125.0(8) . . ?
F2B F3 P 66.6(6) . . ?
F3B F3 P 60.3(4) . . ?
F3B F4 F4B 120.7(9) . . ?
F3B F4 P 72.7(5) . . ?
F4B F4 P 68.5(4) . . ?
F1 F1B F2 117.0(6) . . ?
F1 F1B P 67.2(3) . . ?
F2 F1B P 69.2(4) . . ?
F3 F2B F2 143.0(10) . . ?
F3 F2B P 79.6(7) . . ?
F2 F2B P 67.4(5) . . ?
F4 F3B F3 110.7(7) . . ?
F4 F3B P 64.3(4) . . ?
F3 F3B P 61.4(4) . . ?
F1 F4B F4 123.9(6) . . ?
F1 F4B P 67.0(4) . . ?
F4 F4B P 58.8(3) . . ?
 
loop_
 _geom_torsion_atom_site_label_1
 _geom_torsion_atom_site_label_2
 _geom_torsion_atom_site_label_3
 _geom_torsion_atom_site_label_4
 _geom_torsion
 _geom_torsion_site_symmetry_1
 _geom_torsion_site_symmetry_2
 _geom_torsion_site_symmetry_3
 _geom_torsion_site_symmetry_4
 _geom_torsion_publ_flag
N1A Ru C1L C2L -22.0(2) . . . . ?
C4 Ru C1L C2L 126.11(17) . . . . ?
C3 Ru C1L C2L 164.41(18) . . . . ?
C5 Ru C1L C2L 111.31(17) . . . . ?
C2 Ru C1L C2L -176.73(15) . . . . ?
C1 Ru C1L C2L 153.28(17) . . . . ?
C3L Ru C1L C2L 32.06(15) . . . . ?
Cl Ru C1L C2L -93.48(16) . . . . ?
Ru C1L C2L C3L -64.2(2) . . . . ?
N1A Ru C2L C3L -70.70(15) . . . . ?
C1L Ru C2L C3L 125.6(2) . . . . ?
C4 Ru C2L C3L 67.45(16) . . . . ?
C3 Ru C2L C3L 107.68(15) . . . . ?
C5 Ru C2L C3L 29.97(19) . . . . ?
C2 Ru C2L C3L 132.2(2) . . . . ?
C1 Ru C2L C3L 15.5(4) . . . . ?
Cl Ru C2L C3L -151.91(14) . . . . ?
N1A Ru C2L C1L 163.72(17) . . . . ?
C4 Ru C2L C1L -58.14(18) . . . . ?
C3 Ru C2L C1L -17.9(2) . . . . ?
C5 Ru C2L C1L -95.61(19) . . . . ?
C2 Ru C2L C1L 6.7(3) . . . . ?
C1 Ru C2L C1L -110.1(3) . . . . ?
C3L Ru C2L C1L -125.6(2) . . . . ?
Cl Ru C2L C1L 82.51(16) . . . . ?
C1L C2L C3L C111 176.1(2) . . . . ?
Ru C2L C3L C111 115.2(2) . . . . ?
C1L C2L C3L Ru 60.91(19) . . . . ?
N1A Ru C3L C2L 109.12(15) . . . . ?
C1L Ru C3L C2L -33.53(15) . . . . ?
C4 Ru C3L C2L -118.66(15) . . . . ?
C3 Ru C3L C2L -95.58(16) . . . . ?
C5 Ru C3L C2L -156.44(15) . . . . ?
C2 Ru C3L C2L -131.6(2) . . . . ?
C1 Ru C3L C2L -174.60(14) . . . . ?
Cl Ru C3L C2L 32.03(16) . . . . ?
N1A Ru C3L C111 -5.93(19) . . . . ?
C2L Ru C3L C111 -115.0(3) . . . . ?
C1L Ru C3L C111 -148.6(2) . . . . ?
C4 Ru C3L C111 126.3(2) . . . . ?
C3 Ru C3L C111 149.37(18) . . . . ?
C5 Ru C3L C111 88.5(2) . . . . ?
C2 Ru C3L C111 113.4(2) . . . . ?
C1 Ru C3L C111 70.3(2) . . . . ?
Cl Ru C3L C111 -83.0(2) . . . . ?
C2L C3L C111 C112 170.8(2) . . . . ?
Ru C3L C111 C112 -107.9(2) . . . . ?
C2L C3L C111 C116 -6.1(3) . . . . ?
Ru C3L C111 C116 75.2(3) . . . . ?
C116 C111 C112 C113 0.6(4) . . . . ?
C3L C111 C112 C113 -176.4(2) . . . . ?
C111 C112 C113 C114 0.0(4) . . . . ?
C112 C113 C114 C115 -0.6(4) . . . . ?
C113 C114 C115 C116 0.6(4) . . . . ?
C114 C115 C116 C111 0.0(4) . . . . ?
C112 C111 C116 C115 -0.6(4) . . . . ?
C3L C111 C116 C115 176.3(2) . . . . ?
N1A Ru C1 C2 -133.98(15) . . . . ?
C2L Ru C1 C2 138.0(3) . . . . ?
C1L Ru C1 C2 49.6(2) . . . . ?
C4 Ru C1 C2 80.51(15) . . . . ?
C3 Ru C1 C2 37.02(14) . . . . ?
C5 Ru C1 C2 118.9(2) . . . . ?
C3L Ru C1 C2 149.63(14) . . . . ?
Cl Ru C1 C2 -55.30(14) . . . . ?
N1A Ru C1 C5 107.08(14) . . . . ?
C2L Ru C1 C5 19.1(4) . . . . ?
C1L Ru C1 C5 -69.4(2) . . . . ?
C4 Ru C1 C5 -38.43(14) . . . . ?
C3 Ru C1 C5 -81.92(15) . . . . ?
C2 Ru C1 C5 -118.9(2) . . . . ?
C3L Ru C1 C5 30.69(17) . . . . ?
Cl Ru C1 C5 -174.24(12) . . . . ?
N1A Ru C1 C11 -12.4(2) . . . . ?
C2L Ru C1 C11 -100.4(4) . . . . ?
C1L Ru C1 C11 171.1(2) . . . . ?
C4 Ru C1 C11 -158.0(3) . . . . ?
C3 Ru C1 C11 158.6(3) . . . . ?
C5 Ru C1 C11 -119.5(3) . . . . ?
C2 Ru C1 C11 121.5(3) . . . . ?
C3L Ru C1 C11 -88.8(3) . . . . ?
Cl Ru C1 C11 66.2(2) . . . . ?
C5 C1 C2 C3 0.4(3) . . . . ?
C11 C1 C2 C3 175.9(2) . . . . ?
Ru C1 C2 C3 -59.27(16) . . . . ?
C5 C1 C2 C12 -177.5(2) . . . . ?
C11 C1 C2 C12 -2.0(4) . . . . ?
Ru C1 C2 C12 122.8(2) . . . . ?
C5 C1 C2 Ru 59.62(15) . . . . ?
C11 C1 C2 Ru -124.8(2) . . . . ?
N1A Ru C2 C1 48.83(16) . . . . ?
C2L Ru C2 C1 -155.3(2) . . . . ?
C1L Ru C2 C1 -150.73(15) . . . . ?
C4 Ru C2 C1 -79.88(15) . . . . ?
C3 Ru C2 C1 -118.8(2) . . . . ?
C5 Ru C2 C1 -37.03(14) . . . . ?
C3L Ru C2 C1 -65.3(2) . . . . ?
Cl Ru C2 C1 129.17(14) . . . . ?
N1A Ru C2 C3 167.65(14) . . . . ?
C2L Ru C2 C3 -36.5(3) . . . . ?
C1L Ru C2 C3 -31.91(18) . . . . ?
C4 Ru C2 C3 38.94(14) . . . . ?
C5 Ru C2 C3 81.80(15) . . . . ?
C1 Ru C2 C3 118.8(2) . . . . ?
C3L Ru C2 C3 53.5(3) . . . . ?
Cl Ru C2 C3 -112.00(14) . . . . ?
N1A Ru C2 C12 -72.6(2) . . . . ?
C2L Ru C2 C12 83.3(3) . . . . ?
C1L Ru C2 C12 87.9(2) . . . . ?
C4 Ru C2 C12 158.7(3) . . . . ?
C3 Ru C2 C12 119.8(3) . . . . ?
C5 Ru C2 C12 -158.4(3) . . . . ?
C1 Ru C2 C12 -121.4(3) . . . . ?
C3L Ru C2 C12 173.3(2) . . . . ?
Cl Ru C2 C12 7.8(2) . . . . ?
C1 C2 C3 C4 -2.0(3) . . . . ?
C12 C2 C3 C4 175.9(2) . . . . ?
Ru C2 C3 C4 -63.28(15) . . . . ?
C1 C2 C3 C13 -173.6(2) . . . . ?
C12 C2 C3 C13 4.3(4) . . . . ?
Ru C2 C3 C13 125.1(2) . . . . ?
C1 C2 C3 Ru 61.30(16) . . . . ?
C12 C2 C3 Ru -120.8(2) . . . . ?
N1A Ru C3 C2 -20.4(2) . . . . ?
C2L Ru C3 C2 162.38(14) . . . . ?
C1L Ru C3 C2 151.41(16) . . . . ?
C4 Ru C3 C2 -115.7(2) . . . . ?
C5 Ru C3 C2 -78.21(15) . . . . ?
C1 Ru C3 C2 -35.85(14) . . . . ?
C3L Ru C3 C2 -154.96(14) . . . . ?
Cl Ru C3 C2 70.65(14) . . . . ?
N1A Ru C3 C4 95.34(18) . . . . ?
C2L Ru C3 C4 -81.89(16) . . . . ?
C1L Ru C3 C4 -92.86(15) . . . . ?
C5 Ru C3 C4 37.53(13) . . . . ?
C2 Ru C3 C4 115.7(2) . . . . ?
C1 Ru C3 C4 79.89(15) . . . . ?
C3L Ru C3 C4 -39.23(17) . . . . ?
Cl Ru C3 C4 -173.62(12) . . . . ?
N1A Ru C3 C13 -142.1(2) . . . . ?
C2L Ru C3 C13 40.7(3) . . . . ?
C1L Ru C3 C13 29.7(2) . . . . ?
C4 Ru C3 C13 122.6(3) . . . . ?
C5 Ru C3 C13 160.1(3) . . . . ?
C2 Ru C3 C13 -121.7(3) . . . . ?
C1 Ru C3 C13 -157.5(3) . . . . ?
C3L Ru C3 C13 83.4(2) . . . . ?
Cl Ru C3 C13 -51.0(2) . . . . ?
C2 C3 C4 C5 2.8(3) . . . . ?
C13 C3 C4 C5 174.2(2) . . . . ?
Ru C3 C4 C5 -62.45(16) . . . . ?
C2 C3 C4 C14 -167.1(2) . . . . ?
C13 C3 C4 C14 4.2(4) . . . . ?
Ru C3 C4 C14 127.6(2) . . . . ?
C2 C3 C4 Ru 65.29(16) . . . . ?
C13 C3 C4 Ru -123.3(2) . . . . ?
N1A Ru C4 C5 -11.24(19) . . . . ?
C2L Ru C4 C5 -127.63(15) . . . . ?
C1L Ru C4 C5 -159.18(16) . . . . ?
C3 Ru C4 C5 117.2(2) . . . . ?
C2 Ru C4 C5 79.16(15) . . . . ?
C1 Ru C4 C5 38.14(14) . . . . ?
C3L Ru C4 C5 -94.53(15) . . . . ?
Cl Ru C4 C5 126.77(13) . . . . ?
N1A Ru C4 C3 -128.44(14) . . . . ?
C2L Ru C4 C3 115.17(14) . . . . ?
C1L Ru C4 C3 83.62(15) . . . . ?
C5 Ru C4 C3 -117.2(2) . . . . ?
C2 Ru C4 C3 -38.04(13) . . . . ?
C1 Ru C4 C3 -79.06(15) . . . . ?
C3L Ru C4 C3 148.27(14) . . . . ?
Cl Ru C4 C3 9.56(18) . . . . ?
N1A Ru C4 C14 110.0(2) . . . . ?
C2L Ru C4 C14 -6.4(3) . . . . ?
C1L Ru C4 C14 -38.0(2) . . . . ?
C3 Ru C4 C14 -121.6(3) . . . . ?
C5 Ru C4 C14 121.2(3) . . . . ?
C2 Ru C4 C14 -159.6(3) . . . . ?
C1 Ru C4 C14 159.3(3) . . . . ?
C3L Ru C4 C14 26.7(2) . . . . ?
Cl Ru C4 C14 -112.0(2) . . . . ?
C3 C4 C5 C1 -2.6(3) . . . . ?
C14 C4 C5 C1 167.4(2) . . . . ?
Ru C4 C5 C1 -64.59(15) . . . . ?
C3 C4 C5 C15 -174.0(2) . . . . ?
C14 C4 C5 C15 -4.0(4) . . . . ?
Ru C4 C5 C15 124.0(2) . . . . ?
C3 C4 C5 Ru 61.97(15) . . . . ?
C14 C4 C5 Ru -128.0(2) . . . . ?
C2 C1 C5 C4 1.4(3) . . . . ?
C11 C1 C5 C4 -174.1(2) . . . . ?
Ru C1 C5 C4 62.77(15) . . . . ?
C2 C1 C5 C15 173.0(2) . . . . ?
C11 C1 C5 C15 -2.6(4) . . . . ?
Ru C1 C5 C15 -125.7(2) . . . . ?
C2 C1 C5 Ru -61.35(16) . . . . ?
C11 C1 C5 Ru 123.1(2) . . . . ?
N1A Ru C5 C4 171.66(14) . . . . ?
C2L Ru C5 C4 70.53(18) . . . . ?
C1L Ru C5 C4 24.61(18) . . . . ?
C3 Ru C5 C4 -38.01(14) . . . . ?
C2 Ru C5 C4 -80.23(15) . . . . ?
C1 Ru C5 C4 -116.0(2) . . . . ?
C3L Ru C5 C4 87.76(15) . . . . ?
Cl Ru C5 C4 -106.03(15) . . . . ?
N1A Ru C5 C1 -72.35(14) . . . . ?
C2L Ru C5 C1 -173.48(13) . . . . ?
C1L Ru C5 C1 140.59(14) . . . . ?
C4 Ru C5 C1 116.0(2) . . . . ?
C3 Ru C5 C1 77.97(14) . . . . ?
C2 Ru C5 C1 35.75(13) . . . . ?
C3L Ru C5 C1 -156.26(14) . . . . ?
Cl Ru C5 C1 9.9(2) . . . . ?
N1A Ru C5 C15 49.9(2) . . . . ?
C2L Ru C5 C15 -51.2(3) . . . . ?
C1L Ru C5 C15 -97.1(2) . . . . ?
C4 Ru C5 C15 -121.7(3) . . . . ?
C3 Ru C5 C15 -159.8(3) . . . . ?
C2 Ru C5 C15 158.0(3) . . . . ?
C1 Ru C5 C15 122.3(3) . . . . ?
C3L Ru C5 C15 -34.0(2) . . . . ?
Cl Ru C5 C15 132.22(19) . . . . ?
C2L Ru N1A C1A -138.1(17) . . . . ?
C1L Ru N1A C1A -124.7(17) . . . . ?
C4 Ru N1A C1A 100.7(17) . . . . ?
C3 Ru N1A C1A 44.4(18) . . . . ?
C5 Ru N1A C1A 93.8(17) . . . . ?
C2 Ru N1A C1A 31.5(17) . . . . ?
C1 Ru N1A C1A 58.1(17) . . . . ?
C3L Ru N1A C1A -172.2(17) . . . . ?
Cl Ru N1A C1A -52.9(17) . . . . ?
Ru N1A C1A C2A 43(5) . . . . ?
N1A C1A C2A C5A 44(4) . . . . ?
N1A C1A C2A C3A 164(4) . . . . ?
N1A C1A C2A C4A -76(4) . . . . ?
F2B P F1 F4B 178.1(6) . . . . ?
F4 P F1 F4B 11.6(5) . . . . ?
F1B P F1 F4B 157.7(6) . . . . ?
F6 P F1 F4B 92.5(5) . . . . ?
F5 P F1 F4B -88.7(4) . . . . ?
F3B P F1 F4B -18.0(6) . . . . ?
F3 P F1 F4B -177(46) . . . . ?
F2 P F1 F4B -168.5(5) . . . . ?
F2B P F1 F1B 20.4(7) . . . . ?
F4 P F1 F1B -146.0(5) . . . . ?
F6 P F1 F1B -65.1(5) . . . . ?
F5 P F1 F1B 113.7(4) . . . . ?
F3B P F1 F1B -175.6(6) . . . . ?
F3 P F1 F1B 25(3) . . . . ?
F2 P F1 F1B 33.8(4) . . . . ?
F4B P F1 F1B -157.7(6) . . . . ?
F2B P F2 F1B 136.0(8) . . . . ?
F4 P F2 F1B 141(13) . . . . ?
F6 P F2 F1B 59.1(6) . . . . ?
F1 P F2 F1B -33.9(6) . . . . ?
F5 P F2 F1B -121.7(6) . . . . ?
F3B P F2 F1B -178.7(9) . . . . ?
F3 P F2 F1B 145.5(6) . . . . ?
F4B P F2 F1B -43.5(7) . . . . ?
F4 P F2 F2B 5(13) . . . . ?
F1B P F2 F2B -136.0(8) . . . . ?
F6 P F2 F2B -76.9(4) . . . . ?
F1 P F2 F2B -169.9(4) . . . . ?
F5 P F2 F2B 102.3(4) . . . . ?
F3B P F2 F2B 45.2(8) . . . . ?
F3 P F2 F2B 9.5(5) . . . . ?
F4B P F2 F2B -179.5(5) . . . . ?
F4 P F3 F2B 166.0(8) . . . . ?
F1B P F3 F2B 18.7(9) . . . . ?
F6 P F3 F2B 85.3(8) . . . . ?
F1 P F3 F2B -5(4) . . . . ?
F5 P F3 F2B -93.6(7) . . . . ?
F3B P F3 F2B -165.3(9) . . . . ?
F2 P F3 F2B -13.9(7) . . . . ?
F4B P F3 F2B 177.9(7) . . . . ?
F2B P F3 F3B 165.3(9) . . . . ?
F4 P F3 F3B -28.7(5) . . . . ?
F1B P F3 F3B -176.0(5) . . . . ?
F6 P F3 F3B -109.4(4) . . . . ?
F1 P F3 F3B 160(3) . . . . ?
F5 P F3 F3B 71.7(4) . . . . ?
F2 P F3 F3B 151.4(4) . . . . ?
F4B P F3 F3B -16.8(6) . . . . ?
F2B P F4 F3B 46.2(10) . . . . ?
F1B P F4 F3B -178.5(9) . . . . ?
F6 P F4 F3B 123.5(9) . . . . ?
F1 P F4 F3B -143.7(8) . . . . ?
F5 P F4 F3B -55.6(8) . . . . ?
F3 P F4 F3B 36.9(8) . . . . ?
F2 P F4 F3B 41(14) . . . . ?
F4B P F4 F3B -134.2(11) . . . . ?
F2B P F4 F4B -179.5(5) . . . . ?
F1B P F4 F4B -44.3(8) . . . . ?
F6 P F4 F4B -102.2(4) . . . . ?
F1 P F4 F4B -9.5(5) . . . . ?
F5 P F4 F4B 78.6(4) . . . . ?
F3B P F4 F4B 134.2(11) . . . . ?
F3 P F4 F4B 171.1(5) . . . . ?
F2 P F4 F4B 175(100) . . . . ?
F4B F1 F1B F2 -78.2(10) . . . . ?
P F1 F1B F2 -49.8(6) . . . . ?
F4B F1 F1B P -28.4(7) . . . . ?
F2B F2 F1B F1 86.9(9) . . . . ?
P F2 F1B F1 48.9(5) . . . . ?
F2B F2 F1B P 38.0(6) . . . . ?
F2B P F1B F1 -167.6(5) . . . . ?
F4 P F1B F1 48.1(7) . . . . ?
F6 P F1B F1 108.9(4) . . . . ?
F5 P F1B F1 -72.5(3) . . . . ?
F3B P F1B F1 38(6) . . . . ?
F3 P F1B F1 -178.0(3) . . . . ?
F2 P F1B F1 -133.3(6) . . . . ?
F4B P F1B F1 14.3(4) . . . . ?
F2B P F1B F2 -34.3(6) . . . . ?
F4 P F1B F2 -178.7(4) . . . . ?
F6 P F1B F2 -117.8(5) . . . . ?
F1 P F1B F2 133.3(6) . . . . ?
F5 P F1B F2 60.8(5) . . . . ?
F3B P F1B F2 171(6) . . . . ?
F3 P F1B F2 -44.7(6) . . . . ?
F4B P F1B F2 147.6(5) . . . . ?
F3B F3 F2B F2 11(2) . . . . ?
P F3 F2B F2 26.9(13) . . . . ?
F3B F3 F2B P -15.6(9) . . . . ?
F1B F2 F2B F3 -68.0(18) . . . . ?
P F2 F2B F3 -28.9(15) . . . . ?
F1B F2 F2B P -39.2(6) . . . . ?
F4 P F2B F3 -17.0(10) . . . . ?
F1B P F2B F3 -165.0(7) . . . . ?
F6 P F2B F3 -92.2(7) . . . . ?
F1 P F2B F3 179.4(4) . . . . ?
F5 P F2B F3 88.3(7) . . . . ?
F3B P F2B F3 12.5(8) . . . . ?
F2 P F2B F3 162.8(9) . . . . ?
F4B P F2B F3 -24(10) . . . . ?
F4 P F2B F2 -179.8(4) . . . . ?
F1B P F2B F2 32.2(5) . . . . ?
F6 P F2B F2 105.0(4) . . . . ?
F1 P F2B F2 16.6(7) . . . . ?
F5 P F2B F2 -74.6(3) . . . . ?
F3B P F2B F2 -150.3(4) . . . . ?
F3 P F2B F2 -162.8(9) . . . . ?
F4B P F2B F2 173(9) . . . . ?
F4B F4 F3B F3 -92.2(12) . . . . ?
P F4 F3B F3 -41.4(6) . . . . ?
F4B F4 F3B P -50.8(8) . . . . ?
F2B F3 F3B F4 59.3(14) . . . . ?
P F3 F3B F4 42.8(7) . . . . ?
F2B F3 F3B P 16.5(10) . . . . ?
F2B P F3B F4 -143.3(9) . . . . ?
F1B P F3B F4 11(7) . . . . ?
F6 P F3B F4 -58.3(9) . . . . ?
F1 P F3B F4 46.4(9) . . . . ?
F5 P F3B F4 123.1(9) . . . . ?
F3 P F3B F4 -135.2(9) . . . . ?
F2 P F3B F4 -178.5(5) . . . . ?
F4B P F3B F4 34.9(8) . . . . ?
F2B P F3B F3 -8.1(5) . . . . ?
F4 P F3B F3 135.2(9) . . . . ?
F1B P F3B F3 146(6) . . . . ?
F6 P F3B F3 76.9(3) . . . . ?
F1 P F3B F3 -178.4(2) . . . . ?
F5 P F3B F3 -101.7(3) . . . . ?
F2 P F3B F3 -43.3(7) . . . . ?
F4B P F3B F3 170.1(4) . . . . ?
F1B F1 F4B F4 11.2(12) . . . . ?
P F1 F4B F4 -15.1(7) . . . . ?
F1B F1 F4B P 26.3(7) . . . . ?
F3B F4 F4B F1 69.1(14) . . . . ?
P F4 F4B F1 16.3(7) . . . . ?
F3B F4 F4B P 52.7(9) . . . . ?
F2B P F4B F1 -158(9) . . . . ?
F4 P F4B F1 -165.3(7) . . . . ?
F1B P F4B F1 -16.9(5) . . . . ?
F6 P F4B F1 -90.1(4) . . . . ?
F5 P F4B F1 89.5(4) . . . . ?
F3B P F4B F1 165.4(5) . . . . ?
F3 P F4B F1 179.7(3) . . . . ?
F2 P F4B F1 14.9(6) . . . . ?
F2B P F4B F4 8(9) . . . . ?
F1B P F4B F4 148.4(6) . . . . ?
F6 P F4B F4 75.2(5) . . . . ?
F1 P F4B F4 165.3(7) . . . . ?
F5 P F4B F4 -105.1(5) . . . . ?
F3B P F4B F4 -29.3(6) . . . . ?
F3 P F4B F4 -15.0(7) . . . . ?
F2 P F4B F4 -179.8(5) . . . . ?
 
_diffrn_measured_fraction_theta_max    0.998
_diffrn_reflns_theta_full              26.03
_diffrn_measured_fraction_theta_full   0.998
_refine_diff_density_max    0.922
_refine_diff_density_min   -0.616
_refine_diff_density_rms    0.080

#===END


data_preg95 

 
_audit_creation_method            SHELXL-97
_publ_contact_author_name         P.S.Pregosin
_publ_contact_author_address      
'Lab. Inorganic Chemistry - ETHZ, CH-8093 Zuerich'
_publ_contact_author_email        pregosin@inorg.chem.ethz.ch
loop_
 _publ_author_name 
'I. Fernadez'
'P. S. Pregosin'
'A. Albinati'
'S. Rizzato'
_publ_requested_journal           'Organometallics' 
_publ_section_title
;
 X-ray Diffraction, PGSE Diffusion and Related NMR Studies on a Series 
 of Cp*-Based Ru(IV)(Cp*)(eta3-CH2-CH-CHPh) Allyl Complexes.
;
_compound_number                  '5' 
_chemical_formula_sum 
 'C10 H10 Cl4 Ru2' 
_chemical_formula_weight          474.12 
 
loop_ 
 _atom_type_symbol 
 _atom_type_description 
 _atom_type_scat_dispersion_real 
 _atom_type_scat_dispersion_imag 
 _atom_type_scat_source 
 'C'  'C'   0.0033   0.0016 
 'International Tables Vol C Tables 4.2.6.8 and 6.1.1.4' 
 'H'  'H'   0.0000   0.0000 
 'International Tables Vol C Tables 4.2.6.8 and 6.1.1.4' 
 'Cl'  'Cl'   0.1484   0.1585 
 'International Tables Vol C Tables 4.2.6.8 and 6.1.1.4' 
 'Ru'  'Ru'  -1.2594   0.8363 
 'International Tables Vol C Tables 4.2.6.8 and 6.1.1.4' 
 
_symmetry_cell_setting            Monoclinic 
_symmetry_space_group_name_H-M    C2/c 
 
loop_ 
 _symmetry_equiv_pos_as_xyz 
 'x, y, z' 
 '-x, y, -z+1/2' 
 'x+1/2, y+1/2, z' 
 '-x+1/2, y+1/2, -z+1/2' 
 '-x, -y, -z' 
 'x, -y, z-1/2' 
 '-x+1/2, -y+1/2, -z' 
 'x+1/2, -y+1/2, z-1/2' 
 
_cell_length_a                    6.9875(15) 
_cell_length_b                    12.489(3) 
_cell_length_c                    14.649(3) 
_cell_angle_alpha                 90.000(5) 
_cell_angle_beta                  99.121(5) 
_cell_angle_gamma                 90.000(5) 
_cell_volume                      1262.3(5) 
_cell_formula_units_Z             4 
_cell_measurement_temperature     120(2) 
_cell_measurement_reflns_used     835 
_cell_measurement_theta_min       3.3 
_cell_measurement_theta_max       25.0 
 
_exptl_crystal_description        'platelike' 
_exptl_crystal_colour             red 
_exptl_crystal_size_max           0.05 
_exptl_crystal_size_mid           0.03 
_exptl_crystal_size_min           0.02 
 
_exptl_crystal_density_diffrn     2.495 
_exptl_crystal_density_method     'not measured' 
_exptl_crystal_F_000              904 
_exptl_absorpt_coefficient_mu     3.205 
_exptl_absorpt_correction_type    'empirical, multi scan'
_exptl_absorpt_correction_T_min   0.85234
_exptl_absorpt_correction_T_max   1.00000
_exptl_absorpt_process_details    'Sadabs 2.01 (Bruker AXS, 1999)'
 
_exptl_special_details
;
 18600 frames were collected on a Brucker SMART CCD diffractometer with a 
 sample to detector distance of 38.81 mm. The counting time per frame 
 was 30 sec and the scan width per frame 0.3 deg. 
;
 
_diffrn_ambient_temperature       120(2) 
_diffrn_radiation_wavelength      0.71073 
_diffrn_radiation_type            MoK\a 
_diffrn_radiation_source          'fine-focus sealed tube' 
_diffrn_radiation_monochromator   graphite 
_diffrn_measurement_device_type   'Bruker SMART CCD'
_diffrn_measurement_method        'phi and omega scans'

_diffrn_reflns_number             5262 
_diffrn_reflns_av_R_equivalents   0.0287 
_diffrn_reflns_av_sigmaI/netI     0.0209 
_diffrn_reflns_limit_h_min        -8 
_diffrn_reflns_limit_h_max        8 
_diffrn_reflns_limit_k_min        -14 
_diffrn_reflns_limit_k_max        14 
_diffrn_reflns_limit_l_min        -17 
_diffrn_reflns_limit_l_max        17 
_diffrn_reflns_theta_min          2.82 
_diffrn_reflns_theta_max          25.01 
_reflns_number_total              1106 
_reflns_number_gt                 1012 
_reflns_threshold_expression      >2sigma(I) 
 
 
_computing_data_collection        'SMART      (Bruker AXS, 2001)'
_computing_cell_refinement        'SAINTPLUS  (Bruker AXS, 1999)'
_computing_data_reduction         'SAINTPLUS  (Bruker AXS, 1999)'
_computing_structure_solution     'SHELXS-97 (Sheldrick, 1990)'
_computing_structure_refinement   'SHELXL-97 (Sheldrick, 1997)'
_computing_molecular_graphics     
 'ORTEP for Windows v1.074 (L.J. Farrugia 1997)'
_computing_publication_material  
  'WinGX v1.64.05(L.J. Farrugia,J. Appl. Cryst.,1999,32, 837)'
 
_refine_special_details 
; 
 Refinement of F^2^ against ALL reflections.  The weighted R-factor wR and 
 goodness of fit S are based on F^2^, conventional R-factors R are based 
 on F, with F set to zero for negative F^2^. The threshold expression of 
 F^2^ > 2sigma(F^2^) is used only for calculating R-factors(gt) etc. and is 
 not relevant to the choice of reflections for refinement.  R-factors based 
 on F^2^ are statistically about twice as large as those based on F, and R- 
 factors based on ALL data will be even larger. 
; 
 
_refine_ls_structure_factor_coef  Fsqd  
_refine_ls_matrix_type            full 
_refine_ls_weighting_scheme 
 'calc w=1/[\s^2^(Fo^2^)+(0.0260P)^2^+2.1438P] where P=(Fo^2^+2Fc^2^)/3' 
_atom_sites_solution_primary      direct 
_atom_sites_solution_secondary    difmap 
_atom_sites_solution_hydrogens    geom 
_refine_ls_hydrogen_treatment     'riding' 
_refine_ls_extinction_method      none 
_refine_ls_extinction_coef        'not refined' 
_refine_ls_number_reflns          1106 
_refine_ls_number_parameters      73 
_refine_ls_number_restraints      0 
_refine_ls_R_factor_all           0.0201 
_refine_ls_R_factor_gt            0.0175 
_refine_ls_wR_factor_ref          0.0453 
_refine_ls_wR_factor_gt           0.0441 
_refine_ls_goodness_of_fit_ref    1.016 
_refine_ls_restrained_S_all       1.016 
_refine_ls_shift/su_max           0.008 
_refine_ls_shift/su_mean          0.002 
 
loop_ 
 _atom_site_label 
 _atom_site_type_symbol 
 _atom_site_fract_x 
 _atom_site_fract_y 
 _atom_site_fract_z 
 _atom_site_U_iso_or_equiv 
 _atom_site_adp_type 
 _atom_site_occupancy 
 _atom_site_calc_flag 
 _atom_site_refinement_flags 
 _atom_site_disorder_assembly 
 _atom_site_disorder_group 
Ru Ru 0.36749(3) 0.040628(16) 0.668742(14) 0.01513(10) Uani 1 d . . . 
Cl2 Cl 0.26612(10) -0.12812(5) 0.60164(5) 0.02458(17) Uani 1 d . . . 
Cl1 Cl 0.31142(9) -0.02853(5) 0.81202(5) 0.01923(16) Uani 1 d . . . 
C1 C 0.3874(4) 0.1589(2) 0.5567(2) 0.0296(7) Uani 1 d . . . 
H1 H 0.4848 0.1587 0.5183 0.036 Uiso 1 calc R . . 
C2 C 0.2089(5) 0.1066(2) 0.5387(2) 0.0290(7) Uani 1 d . . . 
H2 H 0.1641 0.0650 0.4852 0.035 Uiso 1 calc R . . 
C3 C 0.1044(4) 0.1257(2) 0.6132(2) 0.0237(6) Uani 1 d . . . 
H3 H -0.0208 0.0991 0.6184 0.028 Uiso 1 calc R . . 
C4 C 0.2220(4) 0.1916(2) 0.6779(2) 0.0219(6) Uani 1 d . . . 
H4 H 0.1898 0.2173 0.7345 0.026 Uiso 1 calc R . . 
C5 C 0.3973(4) 0.2125(2) 0.6429(2) 0.0252(6) Uani 1 d . . . 
H5 H 0.5024 0.2548 0.6721 0.030 Uiso 1 calc R . . 
 
loop_ 
 _atom_site_aniso_label 
 _atom_site_aniso_U_11 
 _atom_site_aniso_U_22 
 _atom_site_aniso_U_33 
 _atom_site_aniso_U_23 
 _atom_site_aniso_U_13 
 _atom_site_aniso_U_12 
Ru 0.01596(14) 0.01305(14) 0.01684(15) 0.00125(7) 0.00409(9) -0.00068(7) 
Cl2 0.0277(4) 0.0197(3) 0.0270(4) -0.0048(3) 0.0063(3) -0.0075(3) 
Cl1 0.0196(3) 0.0190(3) 0.0203(4) 0.0022(2) 0.0069(3) -0.0020(2) 
C1 0.0330(17) 0.0268(16) 0.0322(17) 0.0169(13) 0.0151(14) 0.0100(13) 
C2 0.0402(17) 0.0234(15) 0.0218(15) 0.0073(12) -0.0003(13) 0.0054(13) 
C3 0.0204(14) 0.0215(14) 0.0284(16) 0.0058(11) 0.0008(12) 0.0040(11) 
C4 0.0232(14) 0.0155(13) 0.0270(15) 0.0057(11) 0.0040(12) 0.0052(11) 
C5 0.0227(14) 0.0144(13) 0.0369(18) 0.0090(12) -0.0003(13) 0.0004(11) 
 
_geom_special_details 
; 
 All esds (except the esd in the dihedral angle between two l.s. planes) 
 are estimated using the full covariance matrix.  The cell esds are taken 
 into account individually in the estimation of esds in distances, angles 
 and torsion angles; correlations between esds in cell parameters are only 
 used when they are defined by crystal symmetry.  An approximate (isotropic) 
 treatment of cell esds is used for estimating esds involving l.s. planes. 
; 
 
loop_ 
 _geom_bond_atom_site_label_1 
 _geom_bond_atom_site_label_2 
 _geom_bond_distance 
 _geom_bond_site_symmetry_2 
 _geom_bond_publ_flag 
Ru C4 2.156(3) . ? 
Ru C3 2.167(3) . ? 
Ru C5 2.195(3) . ? 
Ru C2 2.207(3) . ? 
Ru C1 2.229(3) . ? 
Ru Cl1 2.3591(8) . ? 
Ru Cl1 2.3788(8) 2_656 ? 
Ru Cl2 2.3851(8) . ? 
Ru Ru 2.7748(6) 2_656 ? 
Cl1 Ru 2.3788(8) 2_656 ? 
C1 C2 1.396(5) . ? 
C1 C5 1.420(5) . ? 
C2 C3 1.426(4) . ? 
C3 C4 1.415(4) . ? 
C4 C5 1.424(4) . ? 
 
loop_ 
 _geom_angle_atom_site_label_1 
 _geom_angle_atom_site_label_2 
 _geom_angle_atom_site_label_3 
 _geom_angle 
 _geom_angle_site_symmetry_1 
 _geom_angle_site_symmetry_3 
 _geom_angle_publ_flag 
C4 Ru C3 38.22(11) . . ? 
C4 Ru C5 38.20(10) . . ? 
C3 Ru C5 63.50(10) . . ? 
C4 Ru C2 63.23(11) . . ? 
C3 Ru C2 38.04(11) . . ? 
C5 Ru C2 62.23(11) . . ? 
C4 Ru C1 63.31(11) . . ? 
C3 Ru C1 63.04(11) . . ? 
C5 Ru C1 37.44(12) . . ? 
C2 Ru C1 36.68(12) . . ? 
C4 Ru Cl1 96.82(8) . . ? 
C3 Ru Cl1 105.25(8) . . ? 
C5 Ru Cl1 123.04(8) . . ? 
C2 Ru Cl1 140.67(8) . . ? 
C1 Ru Cl1 159.44(8) . . ? 
C4 Ru Cl1 139.04(8) . 2_656 ? 
C3 Ru Cl1 161.89(8) . 2_656 ? 
C5 Ru Cl1 105.19(7) . 2_656 ? 
C2 Ru Cl1 124.97(8) . 2_656 ? 
C1 Ru Cl1 99.22(8) . 2_656 ? 
Cl1 Ru Cl1 92.76(3) . 2_656 ? 
C4 Ru Cl2 133.32(8) . . ? 
C3 Ru Cl2 95.72(8) . . ? 
C5 Ru Cl2 145.38(8) . . ? 
C2 Ru Cl2 84.17(8) . . ? 
C1 Ru Cl2 109.36(9) . . ? 
Cl1 Ru Cl2 87.87(3) . . ? 
Cl1 Ru Cl2 86.61(3) 2_656 . ? 
C4 Ru Ru 101.77(8) . 2_656 ? 
C3 Ru Ru 137.16(8) . 2_656 ? 
C5 Ru Ru 94.56(8) . 2_656 ? 
C2 Ru Ru 156.41(8) . 2_656 ? 
C1 Ru Ru 121.38(9) . 2_656 ? 
Cl1 Ru Ru 54.48(2) . 2_656 ? 
Cl1 Ru Ru 53.822(19) 2_656 2_656 ? 
Cl2 Ru Ru 117.89(2) . 2_656 ? 
Ru Cl1 Ru 71.70(2) . 2_656 ? 
C2 C1 C5 107.8(3) . . ? 
C2 C1 Ru 70.82(16) . . ? 
C5 C1 Ru 70.00(15) . . ? 
C1 C2 C3 109.1(3) . . ? 
C1 C2 Ru 72.51(17) . . ? 
C3 C2 Ru 69.46(16) . . ? 
C4 C3 C2 107.2(3) . . ? 
C4 C3 Ru 70.46(16) . . ? 
C2 C3 Ru 72.49(16) . . ? 
C3 C4 C5 107.9(3) . . ? 
C3 C4 Ru 71.31(15) . . ? 
C5 C4 Ru 72.39(15) . . ? 
C1 C5 C4 108.0(3) . . ? 
C1 C5 Ru 72.56(16) . . ? 
C4 C5 Ru 69.41(14) . . ? 
 
loop_ 
 _geom_torsion_atom_site_label_1 
 _geom_torsion_atom_site_label_2 
 _geom_torsion_atom_site_label_3 
 _geom_torsion_atom_site_label_4 
 _geom_torsion 
 _geom_torsion_site_symmetry_1 
 _geom_torsion_site_symmetry_2 
 _geom_torsion_site_symmetry_3 
 _geom_torsion_site_symmetry_4 
 _geom_torsion_publ_flag 
C4 Ru Cl1 Ru -99.62(8) . . . 2_656 ? 
C3 Ru Cl1 Ru -137.66(8) . . . 2_656 ? 
C5 Ru Cl1 Ru -69.65(9) . . . 2_656 ? 
C2 Ru Cl1 Ru -154.88(13) . . . 2_656 ? 
C1 Ru Cl1 Ru -85.3(2) . . . 2_656 ? 
Cl1 Ru Cl1 Ru 40.49(3) 2_656 . . 2_656 ? 
Cl2 Ru Cl1 Ru 126.99(2) . . . 2_656 ? 
C4 Ru C1 C2 -80.27(19) . . . . ? 
C3 Ru C1 C2 -37.23(18) . . . . ? 
C5 Ru C1 C2 -118.1(2) . . . . ? 
Cl1 Ru C1 C2 -96.2(3) . . . . ? 
Cl1 Ru C1 C2 138.95(16) 2_656 . . . ? 
Cl2 Ru C1 C2 49.32(18) . . . . ? 
Ru Ru C1 C2 -168.03(15) 2_656 . . . ? 
C4 Ru C1 C5 37.80(16) . . . . ? 
C3 Ru C1 C5 80.84(17) . . . . ? 
C2 Ru C1 C5 118.1(2) . . . . ? 
Cl1 Ru C1 C5 21.9(3) . . . . ? 
Cl1 Ru C1 C5 -102.98(15) 2_656 . . . ? 
Cl2 Ru C1 C5 167.38(14) . . . . ? 
Ru Ru C1 C5 -49.96(18) 2_656 . . . ? 
C5 C1 C2 C3 -0.4(3) . . . . ? 
Ru C1 C2 C3 60.1(2) . . . . ? 
C5 C1 C2 Ru -60.54(19) . . . . ? 
C4 Ru C2 C1 80.51(19) . . . . ? 
C3 Ru C2 C1 119.0(3) . . . . ? 
C5 Ru C2 C1 37.32(17) . . . . ? 
Cl1 Ru C2 C1 146.56(15) . . . . ? 
Cl1 Ru C2 C1 -52.3(2) 2_656 . . . ? 
Cl2 Ru C2 C1 -134.01(17) . . . . ? 
Ru Ru C2 C1 26.3(3) 2_656 . . . ? 
C4 Ru C2 C3 -38.44(17) . . . . ? 
C5 Ru C2 C3 -81.63(18) . . . . ? 
C1 Ru C2 C3 -119.0(3) . . . . ? 
Cl1 Ru C2 C3 27.6(2) . . . . ? 
Cl1 Ru C2 C3 -171.24(13) 2_656 . . . ? 
Cl2 Ru C2 C3 107.03(17) . . . . ? 
Ru Ru C2 C3 -92.7(2) 2_656 . . . ? 
C1 C2 C3 C4 0.3(3) . . . . ? 
Ru C2 C3 C4 62.29(18) . . . . ? 
C1 C2 C3 Ru -62.0(2) . . . . ? 
C5 Ru C3 C4 -38.18(17) . . . . ? 
C2 Ru C3 C4 -116.2(2) . . . . ? 
C1 Ru C3 C4 -80.30(18) . . . . ? 
Cl1 Ru C3 C4 81.52(16) . . . . ? 
Cl1 Ru C3 C4 -92.5(3) 2_656 . . . ? 
Cl2 Ru C3 C4 170.87(15) . . . . ? 
Ru Ru C3 C4 27.8(2) 2_656 . . . ? 
C4 Ru C3 C2 116.2(2) . . . . ? 
C5 Ru C3 C2 78.02(19) . . . . ? 
C1 Ru C3 C2 35.90(18) . . . . ? 
Cl1 Ru C3 C2 -162.28(16) . . . . ? 
Cl1 Ru C3 C2 23.7(4) 2_656 . . . ? 
Cl2 Ru C3 C2 -72.93(17) . . . . ? 
Ru Ru C3 C2 143.99(15) 2_656 . . . ? 
C2 C3 C4 C5 0.0(3) . . . . ? 
Ru C3 C4 C5 63.60(18) . . . . ? 
C2 C3 C4 Ru -63.62(19) . . . . ? 
C5 Ru C4 C3 116.6(2) . . . . ? 
C2 Ru C4 C3 38.26(17) . . . . ? 
C1 Ru C4 C3 79.52(19) . . . . ? 
Cl1 Ru C4 C3 -106.05(16) . . . . ? 
Cl1 Ru C4 C3 151.72(13) 2_656 . . . ? 
Cl2 Ru C4 C3 -12.5(2) . . . . ? 
Ru Ru C4 C3 -161.11(15) 2_656 . . . ? 
C3 Ru C4 C5 -116.6(2) . . . . ? 
C2 Ru C4 C5 -78.30(19) . . . . ? 
C1 Ru C4 C5 -37.05(18) . . . . ? 
Cl1 Ru C4 C5 137.39(16) . . . . ? 
Cl1 Ru C4 C5 35.2(2) 2_656 . . . ? 
Cl2 Ru C4 C5 -129.10(15) . . . . ? 
Ru Ru C4 C5 82.33(17) 2_656 . . . ? 
C2 C1 C5 C4 0.4(3) . . . . ? 
Ru C1 C5 C4 -60.66(18) . . . . ? 
C2 C1 C5 Ru 61.1(2) . . . . ? 
C3 C4 C5 C1 -0.2(3) . . . . ? 
Ru C4 C5 C1 62.67(19) . . . . ? 
C3 C4 C5 Ru -62.90(18) . . . . ? 
C4 Ru C5 C1 -117.7(2) . . . . ? 
C3 Ru C5 C1 -79.50(18) . . . . ? 
C2 Ru C5 C1 -36.56(17) . . . . ? 
Cl1 Ru C5 C1 -171.02(14) . . . . ? 
Cl1 Ru C5 C1 85.32(16) 2_656 . . . ? 
Cl2 Ru C5 C1 -21.3(2) . . . . ? 
Ru Ru C5 C1 139.03(16) 2_656 . . . ? 
C3 Ru C5 C4 38.20(17) . . . . ? 
C2 Ru C5 C4 81.14(19) . . . . ? 
C1 Ru C5 C4 117.7(2) . . . . ? 
Cl1 Ru C5 C4 -53.31(19) . . . . ? 
Cl1 Ru C5 C4 -156.97(16) 2_656 . . . ? 
Cl2 Ru C5 C4 96.4(2) . . . . ? 
Ru Ru C5 C4 -103.27(17) 2_656 . . . ? 
 
_diffrn_measured_fraction_theta_max    0.472 
_diffrn_reflns_theta_full              25.01 
_diffrn_measured_fraction_theta_full   0.472 
_refine_diff_density_max    0.652 
_refine_diff_density_min   -0.375 
_refine_diff_density_rms    0.087 
